# Supplementary material for: Genome-Wide Identification and Characterization of Melon bHLH Transcription Factors in Regulation of Fruit Development
Source: Plants (Basel). 2021 Dec 10;10(12):2721. doi: 10.3390/plants10122721 (PMC8709311; doi:10.3390/plants10122721)
Supplement: Supplementary file 1 [file plants-10-02721-s001.zip › Supplementary Figure S1.pdf]

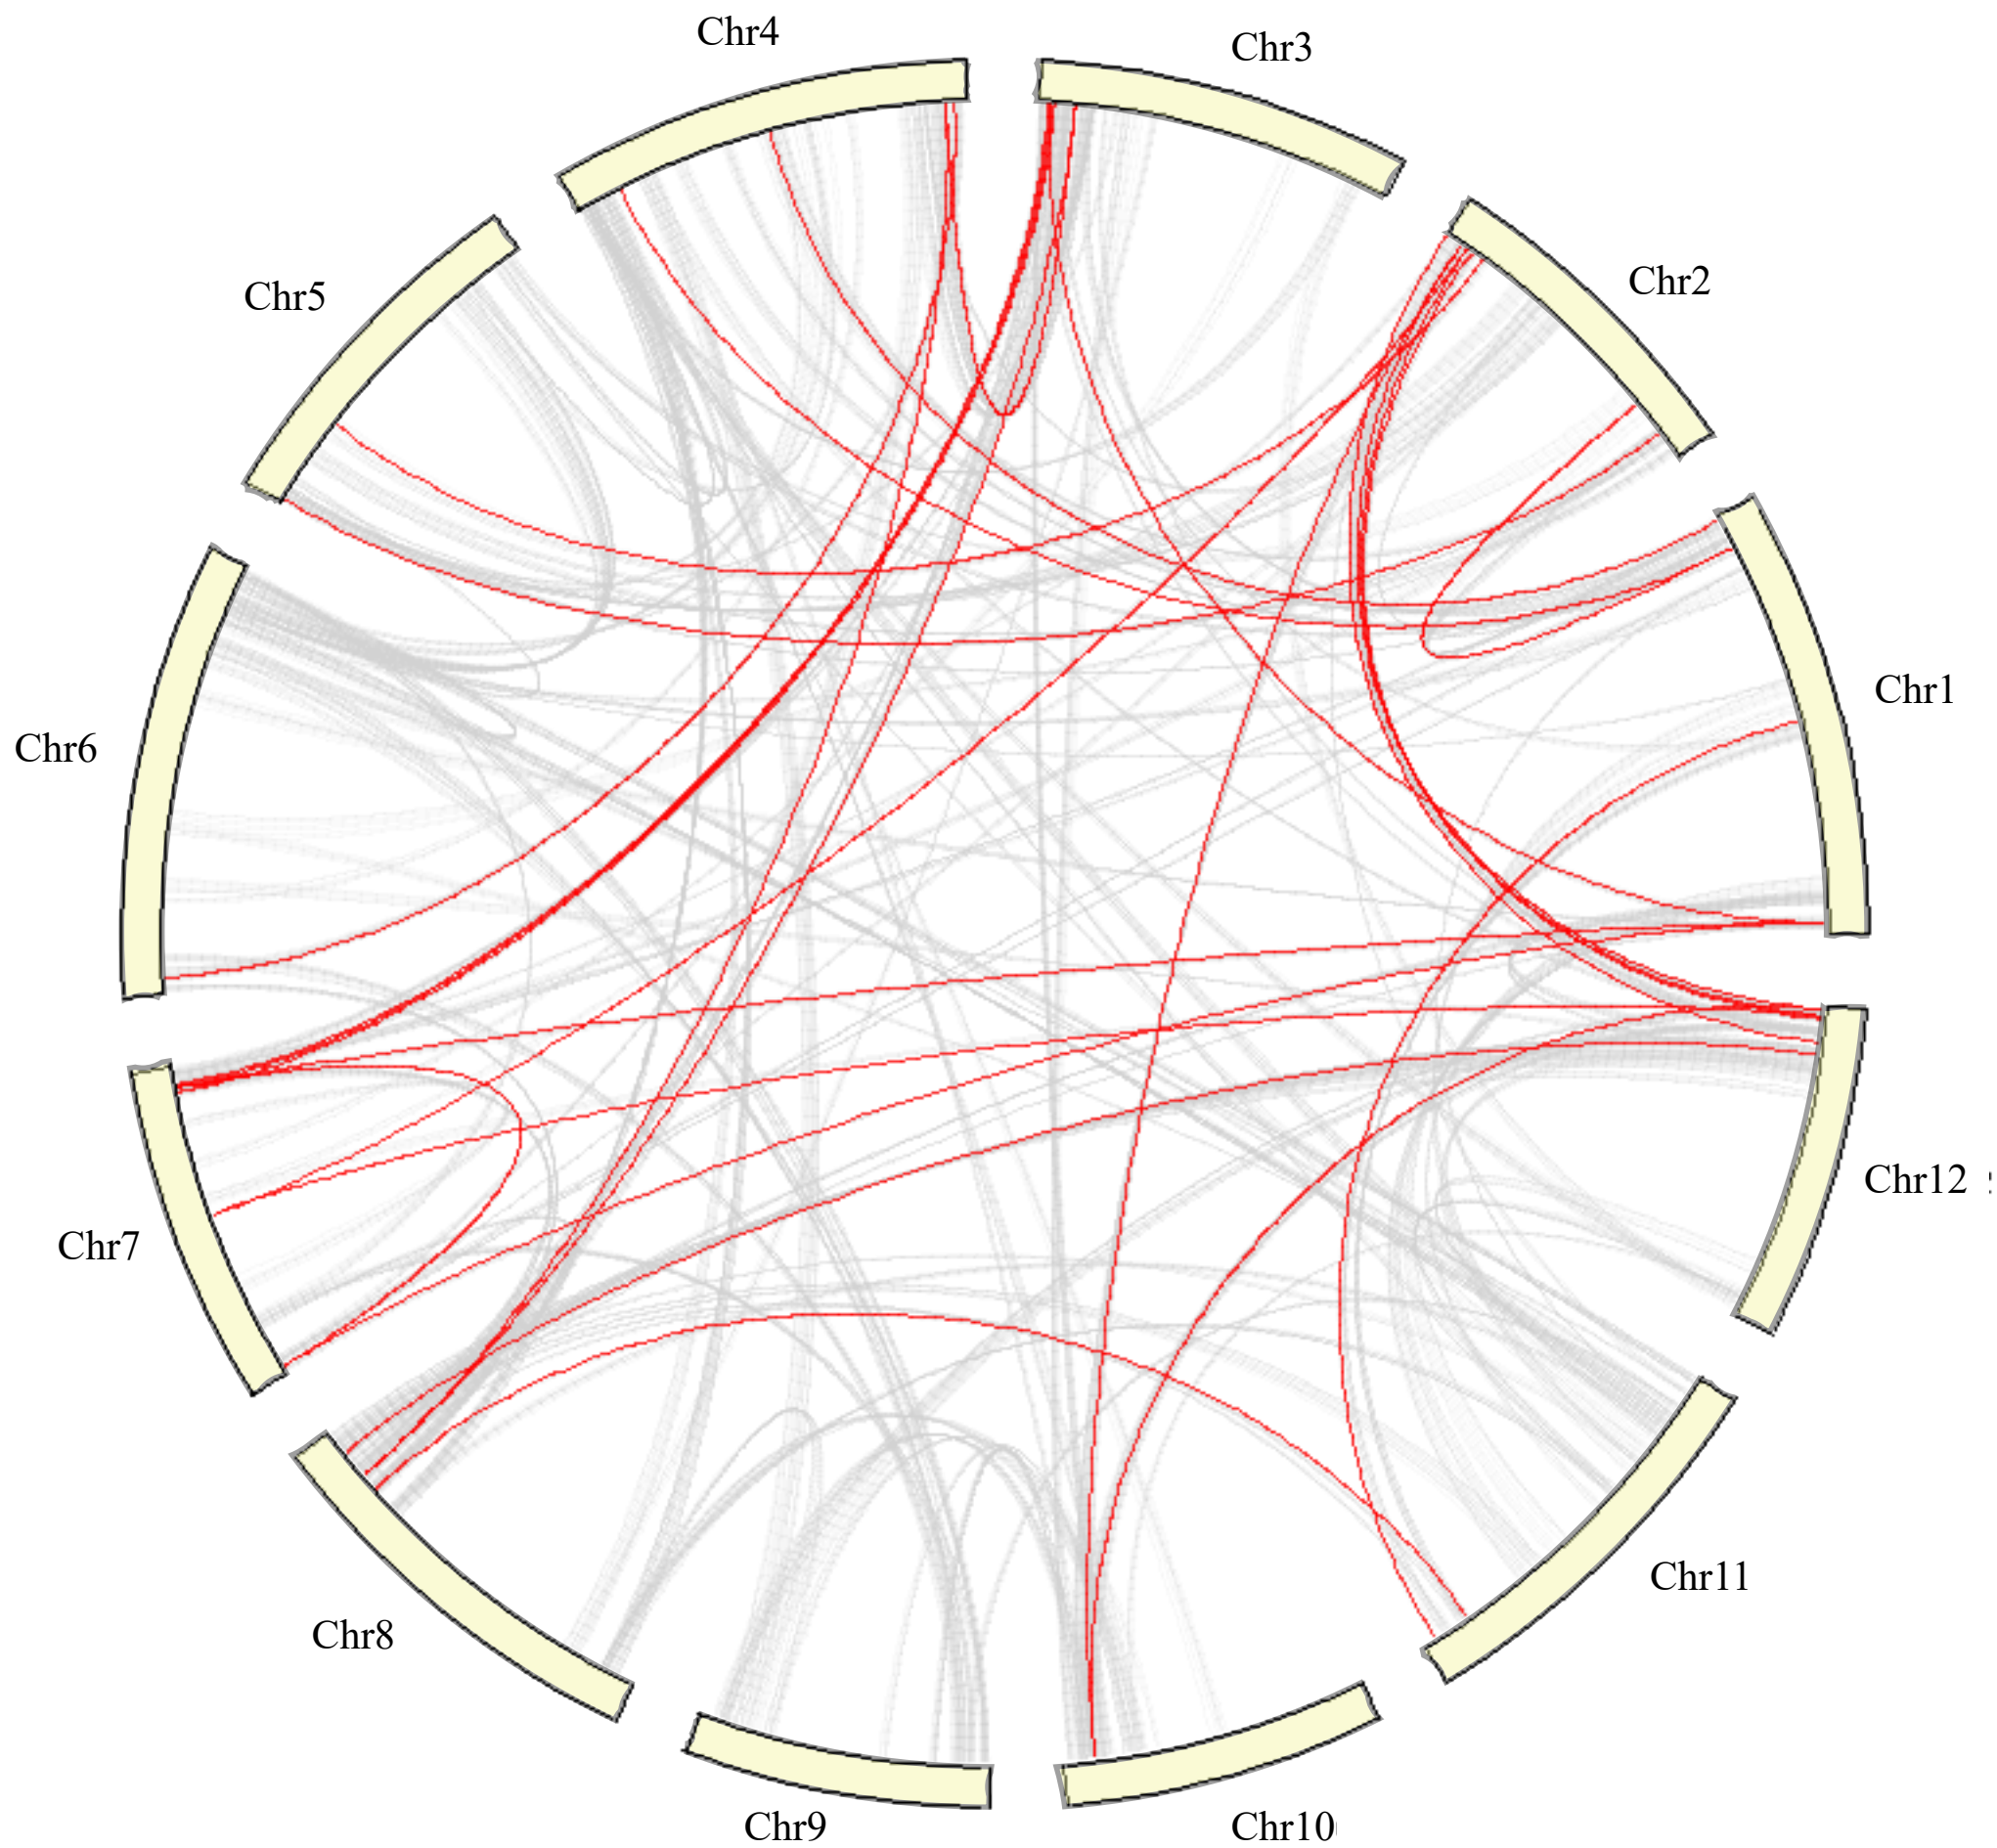

**Supplementary Figure S1** Gene duplication of melon CmbHLH. Red lines links the duplicate genes of CmbHLH, grey lines are background of other genes duplication. Chromosomes are indicated by light yellow bars.
