# Supplementary material for: Genome-Wide Identification and Characterization of Melon bHLH Transcription Factors in Regulation of Fruit Development
Source: Plants (Basel). 2021 Dec 10;10(12):2721. doi: 10.3390/plants10122721 (PMC8709311; doi:10.3390/plants10122721)
Supplement: Supplementary file 1 [file plants-10-02721-s001.zip › Supplementary Table S1.xlsx]

## Sheet: Sheet1
MELON_ID	Name	pI	MW	Intron patterns	ATbHLH (identity %)	Gene description	Sequence
MELO3C013453	CmbHLH1	6.54	30394.8	Ⅶ	CIB1 (85)	Transcription factor	MNRALPEMLHCLNTNGNCSDTLSVLERQRARLKWQQDQLFQQPLNQSCFNRADYGGGFPPPVSVPVDHLTGFPGYMSGGGGGGGGLAHVEMNLQLPAGGGSDGGGEDGVTVEEDENNSKEKRIKTSSEGELSKTTDQNGTKNNSTITTTTNNNRETSADTSKENSKASEVQKPDYIHVRARRGQATDSHSLAERARREKISERMKYLQDLVPGCNKITGKAGMLDEIINYVQSLQRQVEFLSMKLAAVNPRLDFNVDDLFNKEVTKQNNFKFPKLN*
MELO3C015748	CmbHLH2	5.66	65559.2	Ⅵ	EMB1444 (42)	basic helix-loop-helix (bHLH) DNA-binding superfamily protein	MSYHVYSLGEGIVGQVAVTGKHQWITADEQIPNFSSTIEYCDGWQTQFSAGIKTIVVVAVVPHGVLQLGSLDKVTEDVNLVTRIRNAFLTLQESSAGEIKPLHSCKSSGYVKGEDASVSKNVGIELSGSGGFESLKTKPDAINVESFKSQVRLLDDRICGGEPSGCKDTAVGLKQKINVQSQDSAMDMLNICGNLLPAEKIMTNGAYFPMNPHPSSVYDGVNHNGMFTRTNHTEMYLQNDMEASKTIDMYPSNASLKFPAGYELHEVLGPAFLKDALYLDWQTEYVLGGKAFELSEGMSGSQLTSDSPTERLLEAVVADVCHSSSDVKSDTSLCKSGQSLLTTERIPEPSTNATTSACSEGYSMGQSQTSFIGEDMQNSLSSSGVCGVMSPKGFSSTYS…
MELO3C018451	CmbHLH3	6.08	33140	Ⅵ	RGE1 (39)	Basic helix loop helix (BHLH) family transcription factor	MSPHHHPSWTLLNYSGSDVDDDDNNDENNNSNNNTNTGYLPPPPAPMQVGKKRELETHEGKSAGATESSDHDIHIWTERERRKKMRNMFSNLHALLPHLPPKADKSSIVDEAVNYIKTLQETFERLHKQKVEKLNNNSNPSMSCSKIVHNPALPTTREAFLADQASSNDDMSSSATLLSHLSTTVTPENVISILPPPPPPSPPSAFQTWTSSNLVLSVCGRHAHFCVCSAKKPGLFAALCYVLDKHRIDVVSAHVSSDLHQSFFMIQAHVSRGYNELGAATVAEDTFKEAAGEIIFWLSS*
MELO3C018496	CmbHLH4	6.41	27538.7	Ⅸ	AT3G19500 (55)	Transcription factor protein	MAENQSFAGDHLRPTTATTFSQLLFSPHHDDDDDNDVDVDKNHHQIFDYSVSSSSSSFAIDNPPKMLCFGTKEEDQEHPQLGFKSRQRSAHACSDSSSNSSGNGLKFEFKLKRRNGSNPETAAIKEASKKTKPEAPCSAGHAKRKEKLGERITALQQLVSPFGKTDTASVLHEAMGYIKFLHEQVQVLCSPYLQKSQLLSSQSATGKENGETEGDLKSRGLCLIPVDCSLHLANCTVADFWSPAMAMGKKF*
MELO3C018516	CmbHLH5	4.91	38085.3	XIII	RSL2 (94)	Transcription factor	MEQLNGSFIANHEEEDHEEEEEATFMAQLLFNTKANSPPDPFMATLSYDQTPSSSTFYSLSQESSDELLFPTNENNNNHHHHYYYCNPMNNNNDNSSNYFSLGELGNYYNNNNGSNFHLQVPEDSMNVEVSENNSLQPCFEEADQLIKLPEEEAAHYQTEINCKKRSRGEFGDHHVQKGRNERGKKTQKLTSSTNTEEDGNGGLSRQSTSTYCSEDESNASLDRNGGANYNSGSSLNGPNKSRASRGSATDPQSLYARKRRERINERLRILQNLVPNGTKVDISTMLEEAVQYVKFLQLQIKLLSSDDLWMYAPIAYNGMDIGLNPTTPKTAKEKEL*
MELO3C018555	CmbHLH6	7.81	34983.6	Ⅵ	AT4G37850 (54)	Basic helix-loop-helix DNA-binding superfamily protein, putative	MEDNGFVNQWHKSSMDDLGLHPLAAAFGENLQHSYAQTNIDQKASLNHSHNAILGYVKQLKSDGWSSYQTTNHLPNSQVVAYPTVSVSASNYTNQMDFTRPKEEVVCPQSISNLPSDMLISQGSLAHQSHTTKSNRGTRSPSTNSRIPQAQDHILAERRRREKLSQRFIALSAIIPGLKKMDKASVLGDAIKYLKQLQEKVKILEEQTRRKDIESVVFVKKSHVFADGNDTSKEEDEPLPEIEARFCDKNVLIRIHCEKKKDVIERTVAEIEKLHLIIVNSSVMSFGSLAFDITIIAQVITTHHLHNPPNT*
MELO3C018728	CmbHLH7	7.69	23325.5	Ⅵ	-	Basic helix-loop-helix DNA-binding superfamily protein	MEYPNFQFSASSSTAAKIERRIIEKNRRNQMKNLCDQLKSLVPQQYSKEVSLALPDQIDVAIKYIKDLEKKVNSAKEKKNRLQGKNKSAINMDSSSSSSPQLKINQMGKSLEIVLSSGIDNQYLLCETLRILQEEGIEVVNASFSVSGKSVFHTIHAELGDSMVEFGTTKATERLKRLVYGSNSDVELQKEKQWWEEFPSENWDI*
MELO3C018792	CmbHLH8	5.47	34644.2	Ⅰ	AT3G22100 (49)	basic helix-loop-helix (bHLH) DNA-binding superfamily protein	MESSPGDDASSSVWDDACFNAMFSDVSFQSFLAAGNHSQFGGGYIADALTFPDATTSFYPQPSTNFAAECTDSSDGPFFKLPKSEPMDVYEDTETKEPAFVLHDSTSFPHLPDLRSLEQRSSSFNKRARVDSMSNPLQMVEPMVRGCEGFQNFFVPYGQYKTSSDLITTSATASPTVQIPRSTFARQRRQKLSDKTRCLQKLLPWDKKMDIATMLEEACKYVKFLQAQLLALQSMPCESALSSYNSSNPYITGVFGGLERLNRNQLLQVLVNSPVAQTMLCSQSCCVFSAEQLGLIQKIAEKRVLPTFHPKP*
MELO3C023532	CmbHLH9	8.61	46613.4	XII	FBH4 (36)	Transcription factor protein	MSLLYSTNFKFSNDEMKKYPDFMDCDSTNNHHSQQEHNNSGGLMRYCSAPNSLFASLVDGTEGFNSSNNGGGSREDYRFIRSSSPEVEVILSRFMASCNGKFDSGSGERTVKEETGEPVRQQNGFCNQSSSMVNTSSVDSGGRAQIGNSYGVMNSSDFDNSMQSQLGARNCSNLFRQSSSPAGFFSHLTAENGNTTREVDKFGTCNRKDVNAAYPSTRIGSQMNLSGHSFGSNHMPPIAEEENKSIGIVSSSRHRQKANSGDRLQTDDFLNSSWDNSAMRDIKRGRDNNGHAFSTSIVLKTQQNADSGNNIRGLAHHLSLPISFNKDPVEKYLRFQEPVPHQIRAKRGCATHPRSIAERMRRTRISERIKKLQELFPDMDKQTSTADMLELAVEYIKGL…
MELO3C024155	CmbHLH10	7.58	46932.4	XIII	PIL5 (38)	Transcription factor	MASWLNYPLVEDHNFCSDLLFPAITAPLCANPQPDLRPSATATLTLTPRPPIPPCRRPEVQTSVQFSRNKATVESEPSNSKVMVRESTVVDSCDTPSVGPESRASQMARRKLVEVVNGGGVRYEIARGGDGVRGPSVGGDGTGEKEMMTCEMSVTSSPGGSSASAEPACPKLAVDDRKRKGRALDDTECHSEDIEYESADPKKQLRGSTSTKRSRAAEVHNLSERRRRDRINEKMKALQELIPRCNKTDKASMLDEAIEYLKTLQLQVQMMSMGCGMMPMMFPGVQQYLPPPMGMGMGMGMEMGMNRPMMQFHNLLAGSNLPMQAGATAAAHLGPRFPLPPFAMPPVPGNDPSRAHAMNNQPGPMANSVGTQNTTPPSVLGFPDSYQQFLSPTQMQFHM…
MELO3C024411	CmbHLH11	6.34	43328.1	Ⅰ	AT3G21330 (48)	Transcription factor	MDHLNWNGYGSRVAKKTTASTTSSSSFWSNYQQGVEERFMISSSNNSNFFNSVQDFPIKVAENSSTPVLKTEDPLVMSPPLTSFTTSSNMDVVGFLSQLDHGSNGDKSATVTTCSLESLDCLLSATNSNTDTSVEDDGSVSMMLTDYTNLWNFGGNAAVSSKESEKNGSNSTKRSHEQTQFKAADYSIFSNNIINLSDSTSDSGGFRIITDHNLPKQKKPRSEKPPSSSNINFQQSCSSGSSCIDQEPDPEAIAQMKEMIYRAAAFRPVNLGLEMIEKPKRKNVRISTDPQTVAARQRRERISERIRVLQRLVPGGSKMDTASMLDEAANYLKFLKSQIKALENLGQKLESLNCPPTSIAFSFNPSFPIQTSSSHNNFTLLNPNHLINQYPQN*
MELO3C010237	CmbHLH12	6.34	44073.2	XIII	LRL1 (56)	Transcription factor	MQPCSREMQSLNSLLNHSQISLQDLHADHHLNPPPPQIPPSHFHHFDPSAASNDDFLEQMLNTIPSCSWPDLNPSNPKSPWDLNPINKPSRDISDDPHQNHLTATSPAAKAAVMLQQQLLLSRGMSGSAGNGVADHGLPPMPLSLGNADLDRSQNDVVDGSCFRPPNSGGSLQSNSFGAPGNVMNQTPGGGSAGVSQSQPKQKVRARRGQATDPHSIAERLRRERIAERMKALQELVPNANKTDKASMLDEIIDYVKFLQLQVKVLSMSRLGGAAAVAPLVADVSSEGGGECMQGSGAQAGGRNSNNNGNGGNQTASTNDSMTVTEQQVAKLMEKDMGSAMQYLQGKGLCLMPISLATAISTSTCHSRNPLMNGGGGGSQHPVMASNGEGPSSPSMSVL…
MELO3C015207	CmbHLH13	8.19	47883	XIII	FBH4 (38)	Transcription factor protein	MEADFQQQHHHILHEHHQQQPQMNSGLTRYRSAPSSYFRSLTDREFCDQFFNRPSSPETERIFARFMTGGGGPEGSSQNLDESQKSAQGGEVLVSTEANQQTSYVGNQTRAIHQQPSNVNTNYPPVSSTPSFYQTSMKPPLPNQGMISQTDGSGSIAVDLKPRIRTDGGRTSNLIRQSSSPAGLFDHIKINDSGYAALRGMGNFGTRSSFNEEASFSSPSRLKNFSPRTLPPHSSGLMSPVVGIEKKSIRETNQDTKSFAESQTSDYGSTSFPVGSWEDSAVMSDNIVGQKPLEDNDDDEKSYSNFNISDTKKMDTGNRPPLLAHHLSLPNTSAEMSAIEKILQFSDSVPCKLRAKRGCATHPRSIAERVRRTKISERMRKLQELVPNMDKQTNTSDML…
MELO3C015379	CmbHLH14	5.78	34117.5	XIII	UNE12 (74)	Transcription factor	MAGIPSEGLGDDFFEQMLAVPPSYGGAGGGDMVSLPMGLQLGSGGGGGGNGGGMGMPLGLNLEQGFLRQERFREEVDGGHNSNSNNNASSSSTASSGITERDSSMQHMTNLFPTFGHLQTQQLRPPPPLHLHQPFHNQTNTGTVAAVPQPPQVRPRVRARRGQATDPHSIAERLRRERIAERMKALQELVPSCNKTDRAAMLDEIVDYVKFLRLQVKVLSMSRLGGAGAVAQLVADVPLSSVEGEGIESGNNQQAWEKWSSDGTEQQVAKLMEEDVGAAMQFLQSKALCIMPISLASAIFRTHQADPQILVKPEMNTP*
MELO3C015488	CmbHLH15	9.64	40422	Ⅵ	AT5G56960 (38)	Basic helix loop helix (BHLH) family transcription factor	MELPQPSTKSKLIPGPSSIPILNPNTLSSSSSSLRSSSMDSPAESPFTTADIPILQSQLQPSSINSIFAQARNLQFPTPEALDEAMTRTILAVLSSPACSSSSSVHQPLENLPPSYHVNVKSSAFKKYARVLTPTKIRLNRNLSTRQSLLKRSLAFMTNLNLMRLRERMPTTSRPTSSQLHHVISERRRREKLNDSFQALKSLLPPGTKKDKGSVLTTTREYMSSLKAQVAELSRRNQQLEAQLLQSSKEEEKEEAILFPREDIRFRVGISQVQESTSEGQIIDLNIATRGESSSLTNIVIGVLEFLRQLNNVRVLSMDGNTQLTPSSSSINHLTLRLIIEENEWDKSAFQEAVERVVSDLAK*
MELO3C017140	CmbHLH16	6.04	30081.5	XIII	AT5G62610 (58)	Transcription factor	MDPPLVNESSFSAANPSAYSLASIWPFGGEQGGSVLGLRMANLAQNLGGFRESSTNRDGSMEESTVTEQSGGGRKRKDVSSEDESSRMVSTSSANQLSNSNDKRMKVVESRDENGGIKAEVDPNSADGKKLAEQSPKPEPPKDYIHVRARRGQATDSHSLAERARREKISERMKILQDLVPGCNKVIGKALVLDEIINYIQSLQRQVEFLSMKLEAVNSRMSISPGIEGFTVKNIVNQPYDAAGILYGSQAARDYTQGAQPEWLHMQIGGGFERTS*
MELO3C017164	CmbHLH17	9.09	10466.8	Ⅵ	BS1 (80)	Transcription factor	MSSRRSRSRQSGSSRSITDDQINDLVSKLQQLLPEIRHRQSDKVSAAKVLQETCNYIRNLHREVDDLSERLSELLATSDTAQAAIIRSLLMQ*
MELO3C017166	CmbHLH18	6.16	27971.8	V	PYE (36)	Transcription factor	MVSEVPSKPVVETDASVSRNCPPGKKNQVKVPKKIHKAEREKLKREHLNDLFLDLANALELTEPNNGKASILSEASRLLKDLFGQIECLRKEHASLLSESRYVDIEKNELREETSALASQIEKLQSELQSRAVHSKPDLYITPPSEFPQQGTTVQHFSGECLGLPVMEPSLQQTHAVFIVPVRPDLPSYPGTDATHAPIMPTSHVSKPHARYPTPADSWPAGLLKLSQTTEANKEVLAIGCKNIADMGERGYE*
MELO3C017202	CmbHLH19	7.35	41043.8	Ⅸ	UNE10 (39)	Transcription factor	MSQWIVPNLNHHHHHQTHQSQQQEDANKSSSHVHNFSHKNSTLFSHNLIPTPKYEGMERTWESGDQQEAAMEGHGHCHGEVLPQMPSTKHSWSESEDTLESIVHSSLSRKRTRSNPEYWKDETLMTEASLESHRTFKSKNSIQDLAVEHDGSEEEYNMKGKMGGSCSNRQTRTAAINHNQYERRRRDRINQKMKDLQKLVPNGSKTDRASLLDDTIQYLKQLQAQVQFMGSIRSASQMVMPLGIQQQQQQLQMSLLAARTGLLDAASVASSSSSFPWAATFPQILLPSIVSTTKPKSKFSTGAFVPPTDPFCTFLAQSMDMDFYSKMVTLYCQEVNRTPQQTNKLMQSQRIGGDKEDMHHS*
MELO3C017257	CmbHLH20	8.14	57979.4	X	BIM1 (45)	Transcription factor	MELPQPRPFGAEGSKSTHDFLSLYTHSSPQLDPRSTAQGSYLKTHDFLQPQERIRKASTKEEADVERPPPPAPPPSVEHLLPGGIGTYSISHVSYFDQRVVLPKPEGSVFTGVRSSSSAERNDENSNGSSFAAAGSGFTLWEECSVKKGKTGKENNVGDRPHEPRASTSQWTASMERPSQSSSNNHHNTFSCLSSSQPTGTKNPTFMEMLKSAQSTSQDEELDDDGDFVIKKETSTANKGGLRIKVDGNSSDQKANTPRSKHSATEQRRRSKINDRFQMLRGLIPHSDQKRDKASFLLEVVEYIQFLQEKVQKYEGSYQEWNQEMAKLVPLRNNQRSADVYNDQPRGISSGSVPALVLAAKFIEKNSPLSPIVPGSSHNAVDSDTSSASTLKAVDHHSG…
MELO3C017314	CmbHLH21	6.87	29885.7	XIII	BEE1 (82)	Transcription factor	MADHDFTSSFPLEDPNLELMASHFSPSIPNFTHFLPFSTTNTEIFSQFIPPNFPENNATSSFTTSPVLPSHSVFGPPAPTPSVSTTTHHFHDINNHKRKSMPMDVSESTSGISTPQVSESGFNTKYSSGKGKRLKSLEKEEEKSTREVVHVRARRGQATDSHSLAERVRRGKINERLRCLKDIVPGCYKTMGMAVMLDEIINYVQSLQNQVEFLSMKLAAASSFYDFNSEADAISKLQRAKAHEAKELERLMKEGYGGIACFHSNLPL*
MELO3C017424	CmbHLH22	5.68	31712.2	Ⅵ	AT5G57150 (61)	Transcription factor	MDSIGDDYLNSLGTDIFIGEELDSWALEEPLSAYYDSSSPDGSAASKNIVSERNRRRKLNERLFALRSVVPNITKMDKASIIKDAIDYIHDLHDQERRIQAEIYELESGTLKKITGYEFDQDQLPLLLRSKRKKTEQYLSYDSPVSRISPIEVLDLSVTYMGDRTIVVSMTCCKRADSMVKLCEVFESLKLKIITANITTVSGRLLKTVFIEAEQEERDYLKIKIETAIAGLNDPHSPMSIESTNGRHTRKERSDGWKLVLSLIRFFHFALSWGCNVT*
MELO3C024696	CmbHLH23	6.35	42638	XIII	AT4G29100 (54)	Transcription factor, putative	MNRGVLQSSVMQQMMGSENPNWWNMMNISGSMRSSTITQHSSPNHTNNSSSSSSNILFPHSSLPFPSNCYYDAQDHQLIPESWSQLLLGGLVVEDDQKGCMGMFQSKKLEDWEEEILNSNNNNNTQHQQQVDVKKEHSPHANSYVYGHGGGGGVGGGDDYQLVASKQNWSPMIQSSSPQSCVTSFSSNMLDFSNNNNNNKSLADHSRPRNPPPVLDRSSECNSNVNGGAAKKARVQSSSNQTTFKVRKEKLGDRITALHQLVSPFGKTDTASVLLEAIGYIRFLQSQIEALSLPYLGNTSGSTRQHQHQQHSVQAGERNCVFPEDPGQLLNENCLKRKGVSEQEEEGKKDLRSRGLCLVPVSCTLQVGSDNGADYWAPAFGGGGGGGVFR*
MELO3C026173	CmbHLH24	7.03	30342	Ⅷ	AT5G50915 (57)	BHLH transcription factor	MNSNACGWELLEETAPNLQTPHNYDHHLLPPQIQSAPASSSNYQTPQHHHPLGPDHHIYMPSSHSHPPSAEEEDQNGSKGGECKRRRCYNRAKAGERSGCKKKMTIKTQHDPADHVRARRGQATDSHSLAERVRRQKISQRMKVLQTLVPGCHKVTGKASMLDEIINYVQSLQNQVEFLSMKLASLHPVLYDFGMDFPEVLIVGTPASEILNGNGMVSHSEQAELAHNNMAPIYNTFQATGSGGGGSPILTPGNSSFINPSPLFIDHGNTSLLHLS*
MELO3C008307	CmbHLH25	9.01	27441.2	Ⅵ	AT2G40200 (45)	Transcription factor	MEDNNWDRSTKPEGLNFDHCNPNSSHEASLLHPWMINPQFSSSNEFFPSFSSPSEGIIVEDRAASASKSHSQAEKRRRDRINAQLATLRKLIPKSDKMDKAALLGSAIDQVKDLKRKAMEASKNMTVPTDMDEVTIDSTMVEDNSSNNIAIKVSVSCDDRPELLTELIQVIKGLKLTTIRADMASVGGRIKSILILCNKDGEKSVCLNTVQQSLKLVLSRMSSSSTASTYRIRSKRQRFFLPSQYS*
MELO3C010783	CmbHLH26	7.08	37560.1	XIII	AT1G10120 (51)	Transcription factor	MAGSTSGFQCEIMKCSFGVSSSQPLIGVDTSFSSTLGSSSTTPLCELSTASLENEGVKTISNLLHDPSTLSFDMFGSGNFSDMVGSLGFLTEADHSQIANIKCPFSYVQILDDEEMVSPKNDVKSQPDRVNENQRKFVVGSNSSSPNKNAEDNLNVATTEILNKADKTQKVEHRMSANFNTKSDSKQAKGGSQNVQSPKENYIRVQARRGRAANNHSLAERVRREKISERMKLLQQLVPGCHQITGKTVVLDEIINYVQSLQQQVEFLSMKLANVGLESSLETEQILLTNNSYLSSSNVLCKRGENVNDHRSRTFHTSPHVMFQLYGTRPTMPKTTSPSTF*
MELO3C010811	CmbHLH27	5.14	35824.6	XIII	RSL2 (89)	Transcription factor, putative	MEALGVFSDGEWESFAAMFSSEEINQTHIPMTNCCSSELHQLPNNGGSSSSWFYSLDAFVPNLQSYCKQDIRSCSSASVLIPNSSDFFMPIDERNFGSEFFSDVLIEEVDNALAVDAEGDDSGMGRLIENNVSQSNHPPPSPLLDSAGAGNKPIALKRKVNNGDISDNQKKKTRITSHGQRKKKTEDKRRGESAEEEGQSSISYNSDQEENGSEEANGGGSGATSDGGINRKSRASRGSATDPQSLYARKRRERINERLRILQKLVPNGTKVDISTMLEEAVHYVKFLQLQIKLLSSDEMWMFAPLAYNGMDIGLQHNLSPFLSH*
MELO3C010843	CmbHLH28	5.31	41398.9	XIII	SPT (50)	Transcription factor	MADLYGTSPSSDVVGLPHDPEDFSSFINHHLQTTTSSTSSPSCVSFKNKFMPLLHSQPPWHSSPMFSRRPDSTSVPGMSCMLDFPEDRLHSSRVLNHALSDCSVRDVRFADASYLAVNSTCGGVKLSDPGDFVKESSDNAFSSSGAVDSDTNAPLKRRGLSSENDLGDFSCDSEGGDLPEVPSSTDLPRNSSKRSRSAEVHNMSEKRRRRRINEKMKALQNLIPNSNKTDKASMLDEAIEYLKQLQLQVQMLSMRNGLSLQPMCLPGVLQPIQLPQMGLDFDVGNAFLTSRRGIDTSSTRNEGCPMQSTFNLTNKCNLSDQSIAIPSVPNTTTSETAFGFEPTIQGYNGEFNLSSDFKDGEHAAQLDCTRTGKESTDAS*
MELO3C010848	CmbHLH29	6.67	26038.3	III	HEC1 (88)	Transcription factor	MDIEEMGKFGENFEYNEIATTLDFGFGSSNIASTSHLIFPSFNNIPPTTLSMNNATHPVAPPSFPPYSAAARWRSHFPATRNSGTTGEEEVEGSESESMGGGMREMIYRIAAMQPIEIDPEAVKAPKRRNVKISKDPQSVAARHRRERISERIRILQRIVPGGTKMDTASMLDEAIHYLKFLKNQLHSLQIAAASSSSSAYVFPTVAHYNNKQHLIHFPQFPTHPHHHLDQDA*
MELO3C011052	CmbHLH30	6.09	35155.7	Ⅵ	AT1G72210 (61)	Basic helix-loop-helix transcription factor	MMALETVVYPQDTFSYVCRDFCSYAGGPPWGTYDYAFQFEEQKAFLGLIENQTHDQKWEPSPDESSINHQLPGGGPLYPPLELEPTPTPPPPPPPTTGRRKRRRTRSTKNKEEIENQRMTHIAVERNRRKQMNEYLAVLRSLMPSSYVQRGDQASIIGGAINFVKELEQQLQFIKVHKEQTDTSPFADFFSFPQYSTRATTQSKNNNSPHDSSIAHAQWPAGDIEVTMVDTHANLKILSQKRPRQLLKMVAGFQSLRLTILHLNVTTSDQMVLYSLSIKVEEGCQLNTVDEIAAAVNQILLSIQEEAVFS*
MELO3C011094	CmbHLH31	8.98	23805	Ⅵ	AT1G68810 (43)	Transcription factor	MSTAGCSIVDNAADSPKDEKKSTEASRSHKEAERRRRQRINSHLATFRTLLPNTTKTDKASLLAEVVSQVKELRRRATEVARRSTEQSGGGEMVSWPFPSEEDEATLCYCDNENKVMRATVCCDERSSLNRDMMQAIRSVQVRVVRAETMTLGGRTKNVVVMEWSGGGREREEEFMGLRRALKAVVENRAQSVLGNKRARACCPMEDTILMC*
MELO3C011110	CmbHLH32	4.87	38531.4	Ⅵ	bHLH093 (60)	Transcription factor	MELDEHVFLEELMALRRDPNWEAIPNEITDLCSNAWPFDYCFDQTTLNFPPNSSSQPLSTHNLHEFYNPLPNEFSVPQIPDSAFTTMEVAAAPLPFQPEHPNVEREEEEEEEQLGFLADEIQNMETVQVESSCKMEPNQSPEELQVFNIGTCSSSSSSLERKNRAKKLQGQPSKNLMAERRRRKRLNDRLSMLRSIVPKISKMDRTAILADAIEYMKELLEKIGNLQSEVEGSNSRMNSLKNTKPSEFVVRNSPKFEVESRNGETRIEICCGGKPGLVLSTVNTIEALGLEIQQCVISCFNDFALQATCSSQELKQRREVKAEELKEALFRNAGYGGSCL*
MELO3C011399	CmbHLH33	8.97	18201.2	X	BIM2 (69)	Transcription factor E3	MRTGKSNQEDDEYDEDELVGKREGPSSTSNAISSIGNSKDAKNNDKANAIRSKHSVTEQRRRSKINERFQILRDLIPHSDQKRDTASFLLEVIEYVQYLQEKVQKYEGSYQNWSGEPTKLIPWRNSHWRMQTFVGHQQSVKKWFCFRTNVFWEV*
MELO3C026503	CmbHLH34	6.84	32641.2	XIII	BPEp (58)	Transcription factor	MDPPTLINQPSFPTTPNANPNITPFNLSEIWHFPIHGGTSVEDSGPALALRMAHLAHNLTHFGDIAIGNPEVSPTDPVPLQLQQRLPHGHGVSKKRRDSEQDSPKVSSTSNGNNANANSSAGNDSGGKRVKTAACRDDNHESKTEAEPRSGKTEQNSQPTPEQPKQDYIHVRARRGQATDSHSLAERARREKISERMKILQDLVPGCNKVIGKALVLDEIINYIQSLQRQVEFLSMKLEAVNSRIGPGIEVFPPKDYGQQTFDSSGVAFGSQATREYSRGSSPEWLHMQIGGGFERTT*
MELO3C003412	CmbHLH35	5.2	75863.4	Ⅰ	MYC2 (57)	Transcription factor, putative	MTDYRLPPTMNLWADENASMMDVFMNTDLSSFWVTPPQSQQLPQPSYSTATDPSKVVGQTPPQPPPPPSSMAVFNQETLMQRLQTLIEGAQENWTYAIFWQSSYDYSGGTVLGWGDGYYKGEEDKGKEKAKSSSSKAEQEHRKKVLRELNSLISGSPTSEADAVDEVVTDTEWFYLVSMTQSFVSGLGLPGQAFFDSNPIWVAGSDRLASSFCERARQGQVFGLQTMVCIPSANGVVELGSSDLIFQSSDLMNKVRVLFNFNNLEVETWPISGVDQGENDPSSLWISEPSSNAIEITNPVPSASAPTPSTTNSQPISKITTETIENPNKSSVVVETPSSSVPPPSQKTHRQSQPNQTQSFFTNRELNFSELGFENGRLKDRNSTSLKPESGEILNFGES…
MELO3C003421	CmbHLH36	7.73	35847.5	Ⅵ	bHLH071 (58)	Basic helix-loop-helix transcription factor	MSLDALSSNDLFNFIIYDTISATPNNFVPHGHDSSENTFLSDDKCSKPNSRKRCPSEVEISNRVVVPLSTTTTTTTTQHGKKKRKRKAKVCKNKEEAETQRMTHIAVERNRRKQMNEHLSVLRSLMPESYVQRGDQASIVGGAVEFVKELEHLLSTLEAKKLQILQQEVDQHQEQEMNEDSRIRKNDNSDNNNKLFSFASLLMNNSDQNNYSSQYSTKYTSKSKASSADIEVTLIETHANLRILSTRSHRQLLKLIAGLQALRLTILHLNLTDFHPLVLYSISLKVEEGCQLRSVDDIAAAAHHMVRIIEEEAVLC*
MELO3C003492	CmbHLH37	4.71	38249.3	Ⅵ	bHLH093 (61)	Transcription factor	MELNEHYLLEEVLGLRRSEMNWELAIATEMNGWNFDCCSDALPMDQQHNDDLNYLLNGEDQYLSTEAAMAAAAGGSTGDSMSYNTMVETPGSFEVYNIRSMEEEELGILEDEIHNLEVQANNDSYYCKVEPIVVESPEKMLPIFNTGGGTCDEQKIVNYSCGGKKLQGQPSKNLMAERRRRKRLNDRLSMLRSIVPKISKMDRTAILADAIEYVKELMEKIKILEKEINIPNELGILRSHNIVKPNNEYLVRNSAKFNVERREDETKIEICCAAKPGLLLSTVNTLEAMGLDIQHCVISCFNDFAIQASCSQGDDEGRMVSTEEVKQALFENAGYGGKCL*
MELO3C003797	CmbHLH38	6.85	49731.1	Ⅸ	AT1G27660 (42)	BHLH transcription factor-like protein	MESTANLNHHQHQLQDHQLLLASSSSSSSLSVVPSYFGLGTAWSSNISLNSNNTCNVYNNPTIFNGEVTTTNSSHPIRSSDCEQKNTNSTSSIMLQDLGNYDQWNNNNGDNVVNTGNNNFFTQSLHHNQQQISSSTPPTTPPPPPPPPHQSFPKFTEILNNNNITNIQDFININSNNDSDLNDLTHKLLIKTLISSGCQINGADHPIISRSSNNNRPAPHFPQIYPSINVSNWNISSPSPPPPSFSNSLDLNLQTPTDMLVGNFSQNNFGIFKEALSDFGDQIRESPPTGSLPCIIPSKMTTFSSTEVCKPKRGCNSMESRLNQQSPLKKSRLDSRASCPPFKVRKEKLGDRIAALQQLVAPFGKTDTASVLMEAIGYIKFLQNQTLSVPYMKPAGSNK…
MELO3C009231	CmbHLH39	5.25	75971.5	Ⅵ	LHW (28)	basic helix-loop-helix (bHLH) DNA-binding superfamily protein	METLSLNHLLKSLCTHSQWIYAVFWKIKYQTPPILTWEDGYCNYPKVEKHTGNMEYRMIRGFDHVTSYYGTNIYDGDSGSCSVEPAVADMFCLQYALGEGTVGSAASSGNHSWVFLEDIFTSNLSSASIYEGPTEWIIQYASGIKVTENLSVVAYIKDRFNDINFVDGACASVVPRPFESLDEQTNFTTYMLEAENHGAIHDIKPPVSTLNQCAIQDVLTVSRRIRPETVHCEKGHKNDIQRTNMEELFAPLYQSVSTGEVEFSDFISLESLLPLGSQLRNHETGLFESNPHVFHSNSVDNVVEQQSGHNLVTKKEYGIADNFFSFPDDCELQKALGPVLLAQKPTNEFSYDPSSTIRDTTSSLFCSRDFKEGDIEYLLEAMITAEDISDDAFSNNTIN…
MELO3C009651	CmbHLH40	9.25	39987.3	XIII	FBH4 (48)	Transcription factor protein	MGTNTHQSFQQPNSALLRFRSAPSSLFADFAHGIDSKRLNPFESSESERLVSRFGSRGGGCNSNDSESPVAGNYSSGLPPHYPRLSSAVNCSSSSSSSSSSSCSSSSSSMCSSLGFLGSNLVRQSSSPAGVLSQFNQNGYGGGSFSRLSGNNNGGEVVSPSSNRLNSQISFSSLLPSSLGMFPQISEQVVGNEKLSNSNNGETQYFTPSGFPFASWNESSQFSETFPGVKRDPDSNKKFSSSHQNGEIGNRVHLLSHHLSLPKNVSDVASIEKLLQLQDAVPCRIRAKRGCATHPRSIAERVRRTRISERMRKLQDLVPNMDKQTNTADMLDLAVDYIKELQKQFKTLSDNRANCVCVNMQKPLSNQIM*
MELO3C009653	CmbHLH41	5.78	40957.8	XIII	AT3G57800 (50)	Transcription factor	MEIKVGTVGGSSTIGRQSDDTGLESLQFCEEIQGLMTIPAENASSFTALLELPATQALELLHSPDSAAAAVVNDDSVHHCIKDVPKPYFSAFNCNLTFPTNSGLIERVTKLSILAKEHSPETTSSVPLNSSVNFEKVKNEPTTDTDSNPNPLQTLISDPKVENTNQRSAKRKEREKKGRGSTKKSKNESNEDAEKLPYVHVRARRGQATDSHSLAERARREKINARMKLLQELVPGCNKISGTALVLDEIINHVQSLQRQVEFLSMRLAAVNPRVDFNIESILATENEPILESNFPTMVSPLMWPEIPVNGTRQQYQPQWHFDGSVNQQGWARDEHNHHNFSPPENSLLSYDSSANSASLHSNQLKMEL*
MELO3C012975	CmbHLH42	6.38	30874	Ⅸ	AT4G29100 (72)	Transcription factor, putative	MMGGNPSNWWNMFPSNSPQCVLGSSSSLPLSSMADHHHNQDPNSQSWSQLLLGGLQEEDVVDEDKLGLNNNFQQQKKMENLEGRIFIPFSRFGVGDHHHHHQDHNNNDLDHHHDQMKQEITCSQNSKSLGFLWNNNEKELSSPSSSSSSSSAKLSQITRPLTISSSPNSSINNNNALLDFSFNKVDSKNQILDHNFSSDQCASPTTNGGVWKKARVQPSSGQPPVKVRKEKVGDRITALHQLVSPFGKTDTASVLSEAIGYVRFLQSQIEVKFSVNLN*
MELO3C013023	CmbHLH43	5.42	30266.3	Ⅰ	AT3G21330 (51)	BHelix-loop-helix transcription factor	MEDLLWNSSWSNEEDSGSEESLFVSDVPGRCSSPPLQELQTVARILGLPEIDTRTPEIRVEKLAKDSNVFEREKSCPVEVTTGGVLFEVLENDQGIAPKGGFLDIFENQKLSQQNPIIEKLPSSTNSTTPSPSPSSSSSYIEEIEQVVDQDRFVSQMKQWIYYAAVFKPVNLGLETVEKKRRRNVKVSKEPQTVAARKRREKISEKIRVLRRLVPGGSKMDIASMLDEAASYLKFLRAQIKALEGLNYKFGSTDCLSTCTPFNPTFPTNP*
MELO3C018123	CmbHLH44	6.92	26015.5	Ⅳ	ILR3 (80)	Transcription factor	MVSPENPNWLFDYGLIEDIPVPDGNFPVTSSSFTWAIQPFNGAHDTGVEIDGSLADVDGRLESGSKKRVRSDSCSASSSKACREKLRRDRLNDKFLELGSILDPGRPPKTDKAAILVDAVRMVNQLRSETHKLKESNSSLQEKIKELKAEKNELRDEKQRLKADKERLEQQVKSMPAQQPGFLPPIPTFPAQGQAPGNKLFPFVGYHPSVAMWQFMPPAAVDTSQDHVLRPPVA*
MELO3C018125	CmbHLH45	6.85	26135.6	Ⅳ	ILR3 (81)	Transcription factor	MVSPENPNWLFDYGLIEDIPVPDGNFPVTSSSFSWAIQTFNGAHDTGVEIDGSLADLDGRLESGSKKRVRSDSCSASSSKACREKLRRDRLNDKFLELGSILDPGRPPKTDKAAILVDAVRMVNQLRSETQKLKESNSSLQEKIKELKAEKNELRDEKQRLKADKERLEQQVKSMPAQQPGFLPPPIPTFPAQGQAPGNKLFPFIGYHPSVAMWQFMPPAAVDTSQDHILRPPVA*
MELO3C024041	CmbHLH46	6.16	55262.1	Ⅰ	AT4G16430 (49)	BHLH transcription factor	MGEKFWASEEKRVVVESIVGSEACEFLISLASINILPQDSLQFSLGDSSVNQGLSQVLNGSSWNYAIFWRVVTLKSGALALIWGDGNCNDSKIEIGISSGDAQGGKKEELKRQVLQMLQSSFGRSDEDGYGARRDEASDIEMLYLTSKYYKFMCDSGSSLGESYKSGKSIWASDATSCLRNYQSRGFLAKVAGLQTLVFVPVKLGVVELGSIKSIPEDQAVLELVRAAFGGSNTAQLKAFPRIFGHELSLGGTKPRSLSINFSPKLEDDTNYSSEAYELQGLGGNHIFGNSSNGCRGDDNDAKMFPHGNQEVVGGFNAQTRLSTMEFPRDESSPQGDDRKPRKRGRKPANGREEPLNHVEAERQRREKLNQRFYALRAVVPNISKMDKASLLGDAITYI…
MELO3C026599	CmbHLH47	8.73	27052.7	Ⅵ	AT2G41130 (71)	Transcription factor	MMQRHDHDQPQSSELYRLLAQTGAFSLGGAAFPPPPATTTQTMSNSSSSYYPLDNNKSPPGVAAPSPHDRALAALKNHKEAEKRRRERINSHLDKLRTLLPCNSKTDKASLLAKVVERVKELKNETLEIAELESFPSETDEISVLSGEKSEDGRLVFKASLCCEDRSDLIPDLNDILNSLHLKTLRADIVTVGGRIRNVLLIAANDHHSIESVHFLQNALKSLIERSNSSLTSKRRRLVLHHK*
MELO3C003968	CmbHLH48	5.22	28624.3	Ⅵ	AT5G57150 (57)	Transcription factor	MENILDEYRYYWETNMFLQTEEFDRNFSWGLDEAFYGSYDSSSPDGTMSSLEASKNILSERNRRKKLNDRLLALRAVVPNITKMDKASIIKDAIEYIQELRSEENRIETEISNLESGKFKSTTSNEDDDRENNNRNTRKRGTKNSNRQLREKPTSFPIEILDLNVSYMGEKTMVVSMTCERRNDAVLKICQVIESLKLKIITANITVVANRLLSTLFLEAERAEEEELKIKLGKAIAAISDQQNPISI*
MELO3C004148	CmbHLH49	6.03	75653.4	XIII	PIF3 (33)	Transcription factor	MPLSELYRVARGKLDSTQDKNNMVASDLSMNPENDVFELVWENGQILLQGQSNRTRKNSNLNTSQAQCLPTHSPRDRDRDVGYFNNAKMGKFGAIDSVVRDVMSTAPSPDVELAHDDDDDMVPWLSYPLDGHLQHDYSSDFLPELSGVTVNDFPSRNSIASSIGKASGGNQVNRERDMHLNSMHGANLEDGNISKLSSLDVSAARARSSTNQLHSSASQQSQTSFPHLRTKCAGGTENTTGKILHDSLVGHSPQVPLIASSSSSTARQKLDPTPPNNASNIINFSHFLRPAALLKSNPQNHGVPGTGGSRNLDSMVKNSSAANSQPRESSLIAIQGGIRNESNSGCKNAVVPSIDGKNPSDAKPPEQSQANKQPEAACLGDSADHDDRLKHCLEVGATK…
MELO3C004287	CmbHLH50	5.74	35529.2	Ⅵ	AT1G22490 (53)	Basic helix-loop-helix transcription factor	MALEAVVFSQDPLCYNGSKDLYSLLGGGIWANGSFEYPEIPHDFPENQTENFPFEDWNSSSSVFVPNPSPEAADSRNGLLKPPLEAESITPHPIRPRKRRPKSRKNKEEIENQRMTHIAVERNRRKQMNEYLSVLRSLMPESYVQRGDQASIIGGAINFVKELEQQVQVLSTIETKGKINNSAEGCCNSNSNSNSKIPFAEFFSFPQFKAMEGCSLVSENETQCSSTVADIEVTMVENHANLKIRSKRRPKQILKIVAGLHSLSLSVLHLNISTINQIVLYCLSVKVEDDCKLSSVDEIASALHQLLSRIEEDSLMN*
MELO3C004429	CmbHLH51	6.66	32394.3	Ⅸ	LRL1 (93)	Transcription factor	MRLTNSLPDLHTHRRNPPPDTGASQLHHHHHHHPLQTSLFHPNSSFSSDDFLEQILSTLPPPWELPPGLPPQPLPPSNTDNVEFQVGDTTPAAKMAMSLLQQQLLMSRGIDPASTGDDSGLLQMPSNSVVEVDGSSSSSFKCPNPTDHGSVVVPSLFNEFAGFLNSSGSGSQNHNQSQGNSNSQKQNFGAPISANTPPPTGASSCGGAAAAPAPGQPRQRVRARRGQATDPHSIAERLRRERIAERMKALQELVPNANKTDKASMLDEIIDYVKFLQLQVKVKVLSNFLCLIIYFCLSQ*
MELO3C004627	CmbHLH52	9.66	35590.1	Ⅵ	AT5G56960 (36)	Basic helix loop helix (BHLH) family transcription factor	MASSSKLPPNIPSSLSPKSPSIEETPEIPSLLFYNDLSTIPLLPLPPGSSLSGGSRGSAFEEYNVKKPAVEVAMADENRKRESLMKKGLVFYRKFKKRRIEERIIIEAAKRPASAQLIHMIAERRRREKLNESFLALRSILPPQTKKDKASVLATTREYLTKLKAQVSELSHRNHILLQAQDLHIATHHQSTTPTSSLNEPFTVKVSYAPPSPGSTDEIVIDLEIIVRGDMGPLMTDIAIRVLQFLKTIVNVRVVLSFHANHTTSPSPLTRLGFRFSLQGGEWDESAFLEAVRRIVSDLLHVGTHISYSWATLLHHAPS*
MELO3C008668	CmbHLH53	7.25	35917.6	Ⅰ	AT4G00870 (29)	Transcription factor, putative	MKQDPTSSIQSKLQSLILNPQLHNWSFAIFWNLTTTPYSSHSYFHPHSLFPSSAAHSLTSSPHFPFSDLTTAAAVWLNHPSLFFQQTHRGKQLQSFGIKTLVSIPTPNGVLELGSPDSIPHDSELLERIGTEFGFNLKKRENNPSTHVEAERQRREKLNDRFNSLRIVVPNVSRMDKASLLSDAVSYINELEMKISEMESRVSKKKKKNGVDENEMEEEASSRDRRERGIEIDVKIIGGDRAVIRVESRNLSYAVAKLMEALRDLGLKVEHGSMWNWKDLTLQDLVVRVPSGHGYCSDEGIKRALLAILEHGTNINY*
MELO3C014406	CmbHLH54	5.84	71514.5	Ⅰ	TT8 (39)	Anthocyanin bHLH transcription factor	MEGILQFAVQSVEWTYSLFWRFSTQQRMLVWGDGFYNGPIKTTKTLHPAAAAQQQHQQHQHSASLSLHRTHQLTDLYNSLSASDTLRRPTSAALSPEDLTETEWFYLLCLSFSFPPGFGLPGKAYCKKKHVWITGANEIDSKIFSRAILAKTVVCIPLMDGVVELGSTDKVKEDMAFIQHIKSIFIETERRCEAQKPALSELSTSNSATSLDHFYYKHLFHSTNSSNRKESELEDEMDSDSSTSNSSNSNAAEGGGGGCPCWPSTVAGAVMASKPSELIMQLEPSEDIRLGSPDDASNNFFPNLSHSQSPPPELNTNFDYHLPSNTNATTQLQLPTLGYSSAAEAVMTEDQDTHYTNMLSAILNLNQNHQSSQWLNSSAVSNITCSTQSAFSKWTHHSD…
MELO3C020370	CmbHLH55	5.95	31305	Ⅵ	AT2G31210 (75)	Basic helix-loop-helix transcription factor protein	MDTACRRPVPEGEGGESLFPEGSEIVEREGTAGVYEDGDGSGVLEFSRDMADCIGKRRDGKMTKHFATERQRRVQLNDKYKALRSLVPIPTKNDRASIVGDAINYIQELLREVKELKLLVEKKRSSRERSKRVRTAEEIEQGGGGGGGGGGGGSGGGAWDVESSNAKGGEGVVEDQRYNLRSSWLQRKTKDTEVDVRIVDDEVTVKLVQRKLNCLLLVSKLLEDLQLDLHHVAGGHIGDYYSFLFNTKIYEGSSVYASAIANKVMEAVDRQYNNTSISPLTNTY*
MELO3C020417	CmbHLH56	5.87	34450.6	Ⅵ	AT1G68810 (68)	Transcription factor	MKEEGDCFEDQIVMQQNGNVFVAGGGGSDFSEVSPLMFPSHQVPGFNPFLFNPTTLDQHDPFNPSPPQLPSFFNRRNNNISFPYYDNNNVGCAPFELTKMTAQEIMDAKALAASKSHSEAERRRRERINNHLAKLRSLLPNTTKTDKASLLAEVIQHVKELKRQTMLIADASLLPTEVDELSVDVDASDEDGKFVIKASFCCEDRSDLLPQITKTLKSLHLRTLKAEITTFGGRVRNVLFITADNDSSNDQQQDHNPQHQYSISSIQEALKGMMEKVCREEQSSGSIKRQRTNNHNNINIIQNRSL*
MELO3C026778	CmbHLH57	9.54	28376.5	Ⅵ	BHLH92 (49)	Basic helix loop helix (BHLH) family transcription factor	MDDTFPVEFWHNDHFWLDAPISVPLSAPSSPPPATQISAFLPYLSAPPTGLLGQDNNNIATTTTTAATSYDSRNVNKRMIEYWTKHWHEKKELPVSAGDLEREKCHRHMLNERMRREKQKQSYLALHSMLPKNTKNDKNSIVQSAARTIQEMKGLEKTLKRRNSELEMEIAIAMKKKEKEKRIINVALRNTSCGINSMLTVLNVLKTVGVNSKAIHATFFNSQFSAQLAIDTHVRMNTYPSSQIHHPLN*
MELO3C005928	CmbHLH58	5.82	43401.4	Ⅵ	AT3G61950 (44)	Basic helix-loop-helix transcription factor	MERLQGPINPCLYGEYSETGCSEQEFSNLGFEESEEVCLLTSSLEDKIPFLQMLQSVESQSFKEPNFQSLLKLQHLNKPWEEGVSKIQELVELFSSPINSETKDQNQPPNSDRVFSECNQNQGLSQTQMTKFPPVIKERRKRKRSKPTKNKEEVESQRMTHIAVERNRRRQMNDHLNVIKSLIPTSYVQRGDQASIIGGAIDFVKELEQLLESLEALRKERKGAEGECKDEQSEVRVASNRRIGEGVCAELRSEVAEIEVTMIQTHVNLKIRCRKRQGQLLKVIVALEDLRLTVLHLNITSQTAATMLYSFNLKIEDECKLESEEQIAATVNQIFSFMNNGRLVNEAKGKFQAVQWQSLTMEEDPPFPPLFPIRKKEK*
MELO3C006016	CmbHLH59	5.55	65067.9	Ⅰ	AT1G01260 (47)	Transcription factor, putative	MKIEDGLRSVGGKDEDKTVVAAVLGTRAFNYLMSCSVSNENLFMAVRNDENLQNKLSDLVERPNASNFSWNYAIFWQLSHSKSGEWVLGWGDGSCRDPRDGDETEATQILSLQLEDESQQRMKKRALQKLHTLFGGSDEDNYALGLDRVTDTEIFFLLPCISHSLVEREALGSTVVLVPTDVGVVELGSVRSVNESVELVQFIRSLFSSQLSLDRVRSSAAMSMIAERKDESTPFVSWGIADRGEGGAGIPKVFGQTLNSGNMGRSHFREKLAIRKMDERSWEACANGGRIQFQSPRNGIRSPSLAHVHGLKQGNHSPAEIYVSPTPPVNNNHEQLVSGVRDEFGLNPYQSQKLAQMQIDFSVATSRPSVINRVGADSEHSDVEPQCKEEGPGTDERRP…
MELO3C006315	CmbHLH60	5.14	42271.1	Ⅵ	FMA (65)	Basic helix-loop-helix transcription factor	MHLVNSMEKDDNYSNEGSMAPSFSGHQDLYNNQDQFMRSRPNFETSADNSTGILTYFPANPITSPDKLSFGEVMQFADFGPKLSLNRFDDDSEPPGIDPVYFLKFPVLNNERVEETATTGGETEEAAEIGGRSLNIVGEVEEENFRNNNNNNNNNNGNNSNKRKRGRTVKTSEEVESQRMTHIAVERNRRKQMNEHLRVLRSLMPGSYVQRGDQASIIGGAIEFVRELEQLLQCLESQKRRRLLGESPIVQAADTPPPQQPPFLPPGASNFAGHQNDGQIFETTAESKSCLADVEVKVIGFDAMIKILSRRRPGQLIKAIAALEDLQLNILHTNITTIEQTVLYSFNVKIASESRFTAEDIASSVQQIFNFIHANTGM*
MELO3C006435	CmbHLH61	5.71	25503.8	Ⅳ	bHLH104 (76)	BHLH transcription factor	MDPLEDSSCWDFLDCSFFPDADNLINPSLDPLWPPNDSRKGSLADTDVSAGRVESEENDCSRKRTRDGSCAGPSSKACRERLRREKLNDRFLDLSIALEPSRHTKTNKPAILDDAIRVLNQLKNEAEDLKQTNEKLREELKNLKAEKNDLRKEKIILKEEKEKMEQQLKSIAIPSPGLIPGHPATYHAASGKMAVFPGYGLIPMWQYLPPSIRDTSQDHELRPPAA*
MELO3C006563	CmbHLH62	8.87	21209.5	Ⅵ	MUTE (69)	Basic helix-loop-helix transcription factor	MAHIAVERNRRRQMNEHLRVLRSLTPSFYIKRGDQASIIGGVIEFIKELHQVLQSLESNKRRRKSISPSPGPSPRPQLVALGSDKSPFGFENGVDVGACCNSSVADVEAKISGSNVVLKIISRRIPGQLSKMIGVFERLSFEVLHLNISSMDDTVLYSFVVKIGLECQLSLEELAYEVQQSFCSQLYLCQ*
MELO3C006612	CmbHLH63	7.81	22029.4	Ⅵ	-	Putative basic-helix-loop-helix transcription factor	MEACSDSVVPLFPLILPIHHFEATEKEASASRKRCRALEANGGVQKKEKEKRKEMSESFDVLRSLVPNLSPKATRETIVSGAIQFIEFLQKQLMRLEMEKKSSESVTLLPNSNSDSSGGNGDGVIVSISGNIVLFGVIIASVQRGMVTQILLVFERHKTEVLAANVVVSHGNLTLTVTASVHGYVENTIEQIRNDILSLKK*
MELO3C006789	CmbHLH64	7.15	58581.3	XIII	AT3G07340 (38)	Transcription factor, putative	MEKEFFMNDGGCSFYGMEIQPNELNSSGGLLNPNWENSMDHSDLFESTLSSIVSSPANSHIIGGGGGGGDNLMMRELIGRLGSICNSGEISPHSYIGGTNNNSTNTSCYNTPLNSPPKLNLSSIMESQIRGNLIPHPQNLAPFSTDPGFAERAARFSCFGNRNLGGLNGQLGSNETQELSNRSVAGAGVESGKLSRVSSNKSFNIGGIGSPQMGVQEGDQSPVQKGNSMPIPNKKVLNRFSRSSTPENAGDSREGSSVSEQIPVGELGLKCKAETNTRKRKSVQTGQAKDAKAAVENQNGKKIKPDEVTKKEIDGAKGKAEAKASGDANQKQNNDSSKPPEPPKDYIHVRARRGQATDSHSLAERVRREKISKRMKFLQDLVPGCNKVTGKAVMLDEII…
MELO3C013772	CmbHLH65	7.68	48984.9	Ⅰ	MYC2 (29)	Transcription factor, putative	MDEIIISPSSSSPNSITTLQQKLRLILHNRHEWWAYSIFWLPSEDIDGNLVFKWGGGHLRDAQDGDNGGGGGSQLNSFVFEEVSMDPVEAGNFAGLEWYYTVSINQSYGAVDNVVGRVFGSSTYIWLTADNGLYFYDCERVKDARLRGVQTLVFVSTSNGVLELGSSELIKQDWSLVQCAKSLFGFTLFKQKDHVGVGGGGMIQPQAPSCSGVIKRETGNGGGGSSSDSLSDNSDGNFMSTVNNNNVGKKRGKRSANNKTELSSLPVNHVEAERQRRQKLNQRFYALRSVVPNVSKMDKASLLADAADYIRELKSKVQKLESKLKQPQHQTSSSMSNAFDQINRSTISTVEQTTMSYTNNNNNNNVEVRLIGSEAMVRVQCRDENYPSARLLNVLKDLG…
MELO3C013782	CmbHLH66	8.65	34868.2	Ⅵ	LHW (55)	basic helix-loop-helix (bHLH) DNA-binding superfamily protein	MSTCTSKLATGSTDHPRKRLFWELGIEELLDGLSNTSSATKSSVENHHSIGSRRSKMERLSLDSNPIQLLDPCTSMNLTQPSCMVGRFPCKKEAVPKSQVSSWIDDSYSTNIGGSILELSHKSEEPAKICKKRVKPGESNRPRPKDRQQIQDRIKELREIIPSGAKCSIDSLLDRTIKYMLFLQSVTKYADKLKETNKPKVNICGGVTWAFKVGATPTVCPVIVEDLSSPGQMLVEMLCEERGFFLEIADMIRSYGLTILKGVMEIREDKIWGQFVVEVKVNANQSITRINVFLSLMELLQQANIGGTEAVAN*
MELO3C013851	CmbHLH67	6.03	72281.9	Ⅰ	MYC2 (59)	Transcription factor, putative	MTDYRLSTMNLWTDENASVMDAFMNSDLSSYWAPSAASSHSLHHPPPPQSSASTSTPPPDPPKSLPVFNQETLQQRLQALIDGARESWTYAIFWQSSYDYSGGSVLGWGDGYYKGEEDKGKGKAKMVSSAAEQAHRKKVLRELNSLISGSAAGPDDAVDEEVTDTEWFFLVSMTQSFVNGVGLPSQAFYHSTPIWVSGADRLSASACERARQGRVFGLQTMVCIPSPNGVVEMGSTELIHRTSDLMNKVKILFNFNNLETSSWISGTTAAASAADEGENDPSSMWISEPSSTIEMKDSITTTVPSSNVPAKPIRSENPSSSSLTENMSTIQQSHHKQSQSFLNFSDYGFESNPSKNTTATATVTTSTTPSFKPESGGMLNFGNGSLFSGHSQYVTNEQN…
MELO3C014812	CmbHLH68	5.84	57564.7	Ⅵ	ICE1 (56)	Transcription factor	MLPKSTGILWLDGDHEDATSWTTTTNHDNHHSLPIPPAPSISSFKSILPSDCYINSSTPLNPSHQDFPSLSSHPHLPDLPFSSNPSDDFLLHPLDSSSSCSPSHAFPLHPSHSNSILPSHKSSCFSSLLNVVCGSSFDNAFDLGGENGLLGSYQGNQALMGFTGISSLPQIANQELTLNNSDFPVPDNSPAFGPGFNSAAAFENFDACGNALFQNRSKVLRPLEVFPEVGVQPTLFQKRAAHRVGSGGPDKLENLEVSGFKLGEGSMWTPNLERLRKMNGDEDIEDGSVDVSRLNYDSDEPIEYNKQEDNVNAKKCGSHSNANSTITGGDQKGKKKGLPAKNLMAERRRRKKLNDRLYMLRSVVPKISKMDRASILGDAIDYLKELLQRINDLHNELES…
MELO3C020189	CmbHLH69	8.88	22707.7	Ⅸ	BEE3 (77)	Transcription factor	MREFRQNLQHFKSSKASEEMTFNMEVINQFSNATESVLEDFNETESSVENFWGYHFQLPENTSPSSLSNFSSVALLKCQKDFPVITRSSLLVDSAQETMKRKEKQNLGGGRKRRNCEKEQEKPGVVHVRAKRGQATDSHSLAERVRREKINHKLKCLQNIIPGCHKSMGMAMVLDETINYVYSLQNQVEVRNMINFS*
MELO3C026933	CmbHLH70	5.08	41324.2	Ⅵ	SPCH (78)	basic helix-loop-helix (bHLH) DNA-binding superfamily protein	MVDTFADLFQQNDEFVDHTLNPHFEGDDLFSIFESLENVAEFTMIEDDTEPVKDGEETTSLVFSETELETSPKTKRLKTIAATSPTAAMTSTGLSSSEDPNPDGPQRMSHITVERNRRKQMNEHLTVLRSLMPCFYVKKGDQASIIGGVVEYIKELQQVLQSLEAKKQRKVVYSEVLSPRVVSSPRPNLAMSPRKPPLSPRLNLPISPRTPQPTSPYSKPPPRLQQTPSAATGGGAYNNISSSSSSTTNMANNNNSLEPSPCNSCSTTNSSIDNNNNNNSNSNSNNNNDLVANSKSAIAEVEVKFTGPNVVLKTVSPPIPGQAFKIISALEQLSLEILHVKITTLDETMFNSFTIKIGIECQLSAEELAQQIQQTFC*
MELO3C016763	CmbHLH71	7.02	26278.6	Ⅰ	HEC2 (72)	BHelix-loop-helix transcription factor	MENDDLKSEDQMEIMMMMQQMEKIPEFYNDFSPPSSDFSSTTTDNPHCHLDSSSSPPLFINNNNSNNNPPYNFPQQSTVPFPGTSPSRWRNSGSCETESLQKQRSVAAMREMIFRIAVMQPIHIDPEAVKPPKRRNVKISTDPQSVAARHRRERISERIRILQRLVPGGTKMDTASMLDEAIHYVKFLKTQVQSLERAAVSTGNRPITGGGAPSVGFPLEMSSGSYIPNHQSQP*
MELO3C016810	CmbHLH72	9.13	12928.7	XIII	RSL2 (94)	Transcription factor, putative	MNSCSSDNSSEDDNNNNASPKPKTRATRGSATDPQSLYARKRRERINERLRILQKLVPNGTKVDISTMLEEAVHYVKFLQLQIKLLSSDELWMYAPIAYNGMDIGLQQKLSSIL*
MELO3C016841	CmbHLH73	5.7	43538.5	XIII	AT1G10120 (70)	Transcription factor	MGDLENDEMGFRNSNDGLMNCPSTMAMGSFFGSGWDPLVSLGQSENYGAASSMVSSHGEFSNSFPVVLENHGGSGTTQQGVQYPTDLEMGSKLPCFGSGNFSEMFGSFGVAGQILGGCSSNYRNGGTTNTTQTSQENLPLTGEENLPLSVGSPNGKIRKRGLDSTFPFNSNKKSDMKLKKDVSGDSSSTQEEKNAEMEQNLGGNSRGKSTGKQTKEKSNNSAEAPKENYIHVRARRGQATNSHSLAERVRREKISERMRLLQELVPGCNKITGKAVMLDEIINYVQSLQQQVEFLSMKLATVNPDVNVDIERILSKDIFNVRGSNGNVLGFDPGLSAVSPVPPHRMFQFQGTMSNMPTTSTQFPPLPQTMLESDLQSLLQMGFDSGSTIDNLGPNGRLK…
MELO3C017669	CmbHLH74	7.66	22911.4	XIII	AT1G05805 (60)	Transcription factor protein	MGGGGSGSGSGGGGGGRLKNQMSFNGQDNSLSQISEISESFVEAANSCSNGLQSNTNSTHSFAPSSAFAMDSSWDTSSNSIVFAAPHAKRSKHHHSDADFFSGLESQFSLPQTTLEMAAVERLLQIPEDSVPCKIRAKRGCATHPRSIAERERRTRISGKLKKLQELVPNMDKQTSYSDMLDLAVQHIKGLQNQIQKLNKEVENCTCGSKECS*
MELO3C017761	CmbHLH75	7.65	18444.3	XI	AT2G31730 (64)	BHLH transcription factor-like protein	MIASSLCNASAKFPAEVMEVETMMEQKRSLCSVDESALTSLTPKRHKTDFSISSKERKDKLGERIMALQQLVSPYGKTDTASVLLEAMEYIQFLHEQVKVLSAPYLQSTPTVLLQEVEPCSHSLRSRGLCLVPISCTAGVARSNGADIWAPVKTISPKFEKHISPFN*
MELO3C017996	CmbHLH76	4.83	37681.5	XIII	RSL2 (93)	Transcription factor	MEAGAISEREWISLSGAYTAEESDFMANLLNNYCIPNELNSDLTLEIPSSYWASSNEPSYYSSDASDSSNIYALSQPNNNLPYTFNESNPLWMPNNGASSLSLDFSVEDVGNADCLDDNGSNIRKTRQCSRLQQSPADSVVNGKSSQQKRRADGVMVEEAMRDDKVGPVSVENASRKRPQSLLDVEKTKRSGRARKTSKIASGSCNEEDQIVSPNGQCTSSFSSEDDCNEAQEINGGITSSSTSNGKPRASRGSATDPQSLYARKRRERINERLRILQSLVPNGTKVDISTMLEEAVQYVKFLQLQIKLLSSDDLWMYAPIAYNGMDIGLNLKLMKQDNASQ*
MELO3C018898	CmbHLH77	5.76	35900.9	X	BIM2 (38)	Transcription factor	MVKTSKSIHEHFEDDANESGVKIEGKSGESKASGHRSKHSETEQRRRSKINERFQILRELIPQNDQKRDKASFLLEVIEYIQFLQEKLNMYEGSCRGWSSDPSKLMPWKNYRAADSYTDHSQVVKRGPNHESAIVFSQAMLTNAPNVMDADLGPAALLNAVDHTLVSATQGLPMSMHTQPIVFDLVGRSSLSTESLDEPVSGSENVSSKTQAELLPGRTCTTTGFLNHAVSDQDDLTPESELESISGAYSHGLLSTLTQALQASGVDLSQTNISVKVDVGKRANRAISLSEDDKKQSLNNQLMGQSIHGCFSEESEQTHKKLRTGV*
MELO3C026410	CmbHLH78	6.84	61554	XIII	PIF4 (37)	Transcription factor	MNYCFPDWNFEGDLPPAKKSTGPEHDDLVELLWRNGQVVLQSQKAKKSSLIANEVRQFQKQNQPLYRSNVSCGNSSNLIQDDETVSWIQDPLDDSFEKEFCSNFFSELPPADPIDIVKQPIKHFQDDKQTRFGAFDTSTHVTFGNSVKKSSKPPAALAEFPMNTMPPPRFQFQDSSRQNKDLGDLGKLVNFSQVPAPPLKGDLGSSNGGKESGNLIQGEGRDCSAMTVGSSHCGSNQVPNPNDLDLSRVSTSGFRNAGLSAGLSKEDNRKLVAQGERDKTETMDPTATSSSGGSGSSMDRSRTIGQSTGGNSNKRKGRDGEESECQSETAELESAEGNKTAPRSGSSRRTRAAEVHNLSERRRRERINEKMKALQELIPHCNKTDKASMLDEAIEYLKS…
MELO3C007151	CmbHLH79	5.57	27752	Ⅰ	AT1G29950 (101)	Transcription factor protein	MDFMQSDLNFYLKKATHPTATQGDDNHMQIPLSSAFPSVLPPGRKNLGPFNTVEFQPSEVCPQNFIIFDHTDNRSQIMFHPAIANKLSGPTANMCSKYIQKNFCVNDNHYEDREISSPLMEDLDDIDALLSLENENHEGLDGSEDDEVSTARSHLNYGNQSPDSSSSSTYSSKPRKNHSFNPVHKSSSSGSSCSSDMKQLKLKKMVRKLREILPGGYQMTTVTVLDEAVKYLKSLKDEVQKLGVGGLEN*
MELO3C007341	CmbHLH80	5.27	44178.8	XIII	AT1G61660 (41)	Transcription factor, putative	MAEDFQAPICGDNWWNSSRSMLVAVGGLSPCSVGIADLSWPPQPPSAATDSVNNNSSMLFQDYSTFQMMGFALSSSTTSEHWNQSQDLLNSNGIPTNFSSENGLKQGNDGDDYLNCSSTNTTNCQGGLFPVESSLYGYSSPSTKLLQTNLYEDDNSDPRSLFNSTPSITTNSTTFPTNINPPNHLSLSSTPNFSSNYLVKPSLSNPQPHLQFTNNTPFWNASSSNSIPQGIASLLEDKNNPKSQNNTLAFKSMNEDGQDQVKKVDKNSAITTEPTVFKRPRIETPSPLPTFKVRKEKLGDRVTALQQLVSPFGKTDTASVLHEAIEYIKFLHDQVSVLSTPYMKNSNGITPVQHQQVSEKANQDSPKQDLKSRGLCLVPISSTFPVTNASPTDFWTPTF…
MELO3C007678	CmbHLH81	6.67	33485.7	Ⅵ	AT4G37850 (48)	Basic helix loop helix (BHLH) family transcription factor	MDEFKIDPFEFSLDALQFDDLYELPVPPYAVEEKPAKQVKVEKEEEEQAGAGGINKCKTTFVGNNYKGRDSSLSSSSRIISFENNWNHESVNNWNSNNGKRSCSMNRNAMNGREHVIAERKRREKLSQRFIALSALIPGLNKVDKASILGGAIRHVKELQERLKGVEEQTTSKTSEPQVPVVCVKRTTLQPSSSDDDTSSSDENSFSGRLRSTPEIEARFLNNDVLIRIHCHKRKGCLSYLLNRIQSLNNLTILNTCALPFSHSNLDITIVAQMDVGFHMTVEDVVKNLRQALLDFN*
MELO3C007679	CmbHLH82	5.42	35821.3	Ⅵ	AT2G22760 (52)	Basic helix-loop-helix DNA-binding superfamily protein, putative	MEISSANWLSEMELESSFMNDLEMNPFECTLEELSSFQTFSDESYTSHVDLDNNSVQTPTAPPPAKQARTSGSSRRIASMATSSSSSQIISFGNVELSSMVAQPSYDNKNNNKTPNYYCSPNKNHGVGIKRSVAAMNSNNRSPLVAQEHVLAERKRREKLSQRFVALSALIPDLKKMDKASILGDAITYIKDLQERLKVANEQAAKATVESVVFVNKSEDASTIVVSDDSSEENSSSSSDGAIPDVEARVSGKDVLLKIHCKKCTGCLSNILNQIEKLNLTVLNSSALPFGNFRVDITIIAQMDDDFSITVKELVQKLRQASLKFM*
MELO3C007680	CmbHLH83	6.28	31701.2	Ⅵ	AT4G37850 (40)	basic helix-loop-helix (bHLH) DNA-binding superfamily protein	MMECSYEYERMKKCPHDYTLDELNFPAKEKVNNLRSSSQLVSFGDYSGEIENYKFDNYGNLIGSGEKGHEIKKDYCSTIIMGQLPNRNRNHNNSEHVIAERRRREKIRQNFIALSALIPGLIKRDKASVLGGAIEYVKELQERLKWAEEEAEKQKSVIKSVVFVKRINLDSDDSENETFSLDENGDRSSVRSVPTIEIRVLEKDVMVRIHCKKRQGCYTSILSQIEKLKLTILNSCVSPFGESRLDITIVAEMEAGFCMTPMDVGKNLRETLVEFI*
MELO3C007694	CmbHLH84	4.84	38091.6	Ⅵ	bHLH093 (68)	Transcription factor	MELSQHGFLEELLASTPWTSSYSNGFNDFFQNGWNFSSFDENPQMGSSTFPNFPTIQTANDFSFADQQLYSNFLEGFAMPELDSSSYTKNNETPPFVSQEEMSNKNNGYPPVAMEEEELGFMESETAPSVCKVEMEQMGVREINGSIMGIAELGKRSSNKAKKIEGQPSKNLMAERRRRKRLNDRLSMLRAIVPKISKMDRTSILGDTIDYVKELLERINNLKEEETGLDSNHVGLFNGISNEGKSNEVQVRNSPKFDVERKEKETRIDICCATRPGLLLSTVNTLEALGLEIQQCVISCFNDFSMQASCAEQGSAQKAVASSDDIKDALFRNAGYGGKCL*
MELO3C007720	CmbHLH85	10.27	25351.5	Ⅵ	AT4G38070 (44)	Basic helix-loop-helix DNA-binding superfamily protein, putative	MQSIPSYPTSGTMHQIYPQAQAPMINPYSCPISSFPRKEPKLNAAVKHRLAEQNRRNRISGQYATLRAILPSLSKTDKSKLKKAFVLSETIRGVKELKKLVSEKRVANREFRDCGIPSGADRLTLEQCNGGEGMVKAVMSCEDRQDIMAELAKALKTMKVKLVRAEMVTVGGRNKFSLWIQGPKEGHGGIKRVLEAVMKRPSWIARKPRNVWQSRASTDNNFNGVAS*
MELO3C007905	CmbHLH86	6.27	37188.2	V	bHLH121 (78)	Transcription factor	MEQWKSGDFSQSSVPADLVPSSSLQPQPLAVSSTRHHSNQLTESRLRTDAEVKDPIAVRKIQKADREKLRRDRLNEHFLELGNTLDPDRPKNDKATILTDTIQMLKDLTAEVHRLKADYEALSEESRELTQEKNELREEKASLKSDIENLNAQYQQRLRVMFPWATMDPSVVMGPPYSYPVPVPVPPGPIPMHPSLQPFTFFGNQNPGAIPNPCSTFVPYTAAANHPIDQPSAQYASNSHISSKQDSRSKSSDQHRRSNVERCDESTDVATDLELKMPGSSTQQDASSGSKKAKQSQRKEKSVTDCSSSSRFSSSQVLQDSSSNSVGDIPKQNN*
MELO3C008047	CmbHLH87	6.29	24485.5	Ⅰ	HEC3 (92)	BHelix-loop-helix transcription factor	MDPHHLSNPPPHLDRSAMDDHHILHHVHDLDSIWPSFLPFQLSDHHDQQLPTSSTHFLIGYSTPSSGTGDDEEEPEEELGAMKEMMYKIAAMQPVDIDPSTIRKPKRRNVRISDDPQSIAARLRRERISEKIRILQRLVPGGTKMDTASMLDEAIRYVKFLKRQIRLLQSSQPPQQPSTSGGAATAAGGGGWHFPLNKANGSTSSSTSMENTPTITPTGW*
MELO3C019065	CmbHLH88	6.41	27981.9	Ⅵ	BHLH101 (47)	Transcription factor, putative	MLAVSSPLFSPHQWQLEDPISLHHQHNSLFSPFEPSDHSFYLQFPPPPLDPSHDHYPSSAAPSPEAVSNVSKMAKKLSHNASERDRRKKINSLYSSLRALLPSSDQMKKLSNPATISRILSYIPELQQQVEGQMRKKEELMAAMVGQEVKNDEEKKMKSAASSSSSIISASRLSRHEMAIQISTDINGCQRNYLSEILCCLEEEGLLLLNASSFESFDGKVFHNLHLQMGSNCKMEPKVLSNMLLEMFP*
MELO3C026008	CmbHLH89	6.51	21481.8	Ⅰ	APTX (74)	BHelix-loop-helix transcription factor	MDYNFPASNPSSCGSSSGGGGGKEKMKKNNNNNHGGAGKRSKGVVKLSTDPQSVAARERRHRISDRFKILQSLVPGGTKMDTVSMLDEAIHYVKFLKTQIWLHQTMINFVDYDSNSSAAVSAAATANSGFPFEQIASGEYNNMNNLLYPQNDVVKMEEPNFLPQLDPNNNNNVYFPSDHQDQFISSSYDPYINF*
MELO3C005178	CmbHLH90	5.32	57606.2	XIII	AT1G68920 (36)	Transcription factor	MNGKDEFEVENRTSDPMSISSAWQFAAPNLTNESVGFDSTGNPSIVSNGDLGVPSCPSTSMSNLFTPALLNHHTESQNSGFCATFNEQNSIVASNTTLVDGEGLSTLRSNGDTRTLGMDWNQQNPWMKGVFSGNVPGIFPPNLSQLPADSAFIERAARFSCFNNGVFGAPPAGPFGISDSIGIHSGGGFGRQEVISRNGASKDVSLPMELEAKEKSPPKNEKDSEMSQDRAKQGCVGESGNDSDEAGFSGGQDEQCTMGGTITEPSTEGLCFKKRKRGEQNVGLGRVKEASQQINETAKNGAFIQQKGGQNPSSTTSKPAGKQGKQDSQPSDAPKEEYIHVRARRGQATNSHSLAERVRREKISERMRLLQDLVPGCSKVTGKAVMLDEIINYVQSLQR…
MELO3C005610	CmbHLH91	7	29618.5	Ⅵ	AT5G51780 (36)	basic helix-loop-helix (bHLH) DNA-binding superfamily protein	MDLNNVESPFSFDLGDELLPLPSLSCIDNCFVPQFPSILENNNNNSITVSPRPKNGRRKKPPANTSDDKDDENNSNEHKKKKIMHRDVERQRRQEMSSLYSTLRSLLPIEYLKGKRSICDHMHETVKYIRYMQSKIQELCDKRDELKKLQSNNQNPDMVETETLKSTKRDKVVVRARDGSGGIQVILDTATRHRLPLSNILVALTDQGLEILSCSSNKLNDRFLHTIESQPVFTSTNSPIIDVSGLQYTLTNLEYCPLD*
MELO3C021653	CmbHLH92	5.26	50504.1	Ⅵ	AMS (39)	Basic helix-loop-helix transcription factor protein	MEQEAVVDSSNMETSFCVDVNAANGMQSKPFVADQNVVLRDPENQFEAPGSVTLTLENTNVGYDISLDRIRLCNSPMNLQRFNYSPENKNKNEIFTECSHDSFLIDKQGKPYKVSAENELEEVDTIHANTHGQFKENMIEYKEQQREEKDLVKHENGRSDSISDCSDRIEDEDDAIAKYRRRTGQGPQSKNLVAERKRRKKLNERLYNLRALVPKISKMDKASILGDAIDFVKELQKQVKELRDELEEHSDDENGRTGLPGSNGNYNIVQLPEFLSHNDKAQNSYHMGVLGSGSILKQNHQDTEGTSNDKTQQMEPQVEVAQIDGNEFFIKVFCEKKRGGFVSLMEALNALGLEVTNANVTSYRGLVSNVFKVKKKDSEMVQADDVRDSLLEITKYPCR…
MELO3C022222	CmbHLH93	5.88	26585	XIII	FBH1 (59)	Transcription factor	MQSTTGAAATATASSRTSGGGPGLARFRSAPAAWLEALLEDDEEDPLKPNPCLTQLLAANSSDLVSAPGDHPLFDPNPSPAFHRQNSSPPEFLAPSGIAEGFYTSYPLNSSPTLDISPTSKPATDVDAQNFFPKFSPQLKREGSGVSSLIDMEMEKLLEDSVPCRVRAKRGCATHPRSIAERVRRTRISDRIRKLQEVVPNMDKQTNTADMLEEAVEYVKFLQKQIQELTEHQRRCKCMVKE*
MELO3C022846	CmbHLH94	6.46	30054.4	XIII	RHD6 (67)	Transcription factor, putative	MEKNGGGYLKSLAIGKGHDQNPNGDFVFRDATNYQLGLQQQQSLINFGHKMNNESLLSFEAQGICQLDLTYNWDDQERVMEDPNCFQTATSHNNYSPSKDHHHNKNGNSGSVYEWLYCESTTDFSDSIQDAEGTQEIVPNHKRSHSTGESSGSVCKKQCTAAPKKQKPKSATAKDPQSIAAKNRRERISERLKILQELVPNGSKVDLVTMLEKAISYVKFLQLQVKILATDEFWPVQGGKAPDISQVKEAIDVILSSQRERSSSSNTEK*
MELO3C012081	CmbHLH95	9.75	10504.8	Ⅵ	KDR (76)	Transcription factor protein	MSGRSSRSRRSGVGSRNISDEQIADLISKLQQLIPEIRNGRSSSRVSASKVLQETCNYIRSLQREVDDLSDRLSQLLASTDPESAQAAIIRSLLM*
MELO3C012177	CmbHLH96	6.25	58644.6	XIII	AT1G68920 (35)	Transcription factor	MDIGDRDKFRLESSIEGTVNCSNSMSSDWQFGETTLTSMPTGLVLPGNVDVVRNQDMVGCSSSTASVVESFSSTIWEQSAHSQNLGISNIQGHNNSNTSNIIGISKASGCPVSSSSDIDRTLDISWNLSHNILKGGVYLPNIPGMLPPSLSQLPADSSFIERAARLSCFSGGNFGDIVGHFNIPDPVGVFSRGMGVIPDRWDEIPRNGLGLASVTGGQSQRNVINSETSKPVCLTNEHGATETDSPKNGSPLKLDDRGKLAVDGSANESDEAECSGGDGLGEPCTLEATGKELSAKGLGTRKRKRSGQKTELDQANGPLQQTTVSPKDDAETHRKRDQNPNSTANKGTGKHGKQASQPSDPPKEEYIHVRARRGQATNSHSLAERVRREKISERMKFLQ…
MELO3C012213	CmbHLH97	5.67	41060.1	Ⅵ	AT1G68810 (67)	Transcription factor	MCGEDQEEDHQQQHQGECSQTIENMFQEQLLLQQQLQNNDGDQSNNDHHMIYGVEHHHHGIGRSGSLIFPPEVMPPMLQPWSSLNPFMIPPPPPPPLPTSLSCSSSSYGSLFNRRPPNCLQFAYDGPSSADHLGRIISTTLGPVVHPGSTAPFGLQAELGKMSAQEIMDAKALAASKSHSEAERRRRERINNHLAKLRSILPSTTKTDKASLLAEVIEHVKELKRQTSIIAETSPIPTEVDEVSVDDASEQEMMMISNNGSISSSAKFVIKASLCCEDRSDLLPDLIKTLKSLRLTTLKAEITTLGGRLRNVLFVTADEEQQQQHNITSIIQDALKAVIEKTAGDHDSSSANIKRQRTTTTNNINNNNNNIL*
MELO3C022574	CmbHLH98	6.39	50482.6	XIII	AT1G31050 (44)	Transcription factor, putative	MAEECTESSVATSNSTPSNWWDINHNHNHHHHHHPSLSYNSHWLLPNPNSNSSCEEDVSISTSSFTNHLLPHHPSDNNHLWTQVLLNIGNDVELQSNEEDIEGNFLETISSRSSMSTTGIFEPTACSDYLKKMDTSNNNNNNWDDTFQTFNTNTNNNNRLLTSSQAHMLQNERFLKLSNLVNRWSIALPSPDPHLRHLTDDQHDHLRATTVPTHEILESADGVVPHQGLDPCDSSFLRRTLQNQNYGDYISFNGRLAKPMVGINSSSNNPCFKSSLNLSADSKKQIHQICSPTRISGRGSGGVSNEGKKKRSEESSSETSTKKAKQDNSTPYSNKMQQPKVKIGDRITALQQIVSPFGKTDTASVLTETIGYIKFLQEQVQLLSNPYMKTNSYKDPWQS…
MELO3C019226	CmbHLH99	6.76	26840.6	Ⅳ	ILR3 (70)	Transcription factor	MDYPPPNWNWLFDCSTMDDLAVVDPRFSPPQSISFSWSNPSISFVSKDSLEVDCSYEDLDSTKEVGRKRLRGETSAASTSKACREKQRRDKLNERFLELAAVLEPGKPPKTDKVAILSDAIRMMTDLQCETQKLRESKEDLKAKIKELKVEKNELRDEKQRLRAEKEKLELQIRAVNTRAADVQHPPPTLSAAFTAQGQAAGNKLMPFIGYPGIAMWQFLPPAAVDISQDHVLRPPVA*
MELO3C019758	CmbHLH100	9.04	28041.9	Ⅵ	AT1G68810 (43)	Transcription factor	MGHFSQIYSYDGFCASSASMRNGSVSTSSLVLDSERDELVEAPLKLESKGVPTERSAAALKNHSEAERRRRARINGHLGSLRSLVPGGKKMDKATLLAEVISHLKVLKRAAAEVSDAHIIPKEIDEITVEQEDGFNGVPYSIRASLCCDYKPGLLPDLRRALHALDLIIQRAEIATLNGRMKNVFVLTSCKEGNIETTELRRFLETSVHQAIKSVLNKFSDPQEFSFMTFPNKRRRISLFNSSSSSSRGDFW*
MELO3C020781	CmbHLH101	5.18	36921	V	bHLH121 (76)	Transcription factor protein	MDQLIQRDDLLQNPPTPSSSVVPCVELPGHPIRSQSSSRSEGEFKDSAAARKVQKADREKLRRGRLNEQFVELGNILDPDRPKNDKATILMDTIQLLKDLTSQVDKLKAEYATLTEESQELAQEKSDLREEKALLKSDIENLNAQYQQKLRATYPWAAMDHSVVMAPAPFPFPMPMQIPPGPYPLHPSLQPYTFFGNPDPRVIANPCSTFVPYIPPNSLTEQQSSQNAPPFIQLDNRSRNLSEQNTGSKSSSESKIEKSVDSNEVATCLELKTPGSSTDQDTSYEQTNDKNRKESNLSEESSSSRCSSSRSLEANSSSSMPSGRKSTDICGSP*
MELO3C020782	CmbHLH102	5.22	14526.5	V	bHLH121 (62)	Leucine-rich repeat receptor-like protein kinase family protein	MDQLIQRDDLLQNPPTPSSSVVPCVELPGHPIRSQSSSRSEGEFKDSAAARKVQKADREKLRRGRLNEQFVELGNILDPDRPKNDKATILMDTIQLLKDLTSQVDKLKAEYATLTEESQEVIFCMCLSI*
MELO3C020892	CmbHLH103	9.77	23701	Ⅰ	HEC2 (66)	Bhelix-loop-helix transcription factor	MDDIDILKSTLSPSDMSSTFFPNNCPQLLPVIPPPYFSDYSPPPGTSLFQTTPTIIPEAPARQRRSGVSGGGMAAMREMIFRIAAMQPVEIDPEAIKAPKRRNVRISKDPQSVAARHRRERISQKIRILQRLVPGGTKMDTASMLDEAVHYVKFLKRQVQTLEQAGFNYNNNNNNNNNNNNFNNFVNSANLNYASALFKACQIMPASLQMQS*
MELO3C021212	CmbHLH104	5.67	74354.4	Ⅵ	GL3 (40)	Anthocyanin bHLH transcription factor	MACEPGFLRKQLAVAVKSIQWSYAIFWSPSTRQHGSIHQMGVENPIWVLEWCDGYYNGDIKTRKTVQAEDVHVDNMGLHRSEQLRELYRSLLEGESEQRTKKPPASLSPEDLSDAEWYYLVCMSFFFNQGQGLPGRALADDRTIWLCNAQYAESSVFSRSLLAKSASIQTVVCFPYLGGVIELGVTEQVAEDPCLLQHVKDFLLKFSKPICSKKPSSAAYKDDNGKEPMTAKSDNEIVEFLAMENLYCSTAVKFDGKSVNGIQRKKINEFGIDSLDDFSNGCEQYHQMEDSLRLEGVEGGASRFQSLQFLDDDFSYGFQDSMNPSDCISEALANQDKVSSSPRLKDANNLPLKELQNPNQTQSGSLDPSSDEDMHYKRTIFTILGSSTQLVGSPLLHNF…
MELO3C022233	CmbHLH105	6.38	52510.8	Ⅱ	UNE10 (48)	Transcription factor	MSQCVPNWDLSEPPPSSAATGRPPFHSSSAADDVVPLFEYEVAELTWENGQLAMHGLGLPRVTGKVQNSGGGGGGGGVGSKFTWDNKPARASGTLESLVNQGTRHGKNNISFDINTDDTAHGGANDLAPWFSDHHRQTTTASTADAMVPCDGDKSATAGGSAAKSSDIPVVAREEDEDCGVIHGKRGRVVARVVHASGEWSTCRNQISVSGNRESGQKVTLNSTRVRNFAAVDGSVGFTATTATSQGSLDNTTSDKPCVKNTTVTTTDDHDSVCHSTHQVEEEDEGDRKKENAKSSVSTKRSRAAAIHNQSERKRRDKINQRMKTLQKLVPNSNKTDKASMLDEVIEYLKQLQAQVQMMSRMNMPMMLPMAMQQQLSMAPLMAPMGLGMGMGGMGMPLG…
MELO3C022250	CmbHLH106	5.59	48684.9	Ⅰ	AT4G00870 (35)	Transcription factor, putative	MEELLLSPSSSSSSSSSLHHRLRFLLHSQPLPWSYAIFWQTTTDDNGSVFLSWRDGHFQFPSQHPLSPPLLPDDPTDLDWFYMMSLTSSFPAADALPGKSFTSSSVVWLTGSEELHLHDCHRVKEAKSHGIQTFLCVPTSYGVLELASQQIIPEDWGLIQQIKSLFDPGFVNFSNTTDTPLPFLDQDFNFEDIGFISEVAEEEMETPLRKKSKTGEWELSDSDSPVMKTGVMKKTGQKRGRKPNMSKENAMNHVEAERQRREKLNNRFYALRSVVPNVSRMDKASLLSDAVSYINALKAKLEEMELQLRESKKSRDDGGDNQSTTTTSEELMKGKNGGGVRTTTTTTTTTTLVTRFDVEVKIIGRDAMVRVQSQNLNFPSAIVMGVFRDMEFEIQHASI…
MELO3C023299	CmbHLH107	10.13	15743.2	Ⅶ	CIB1 (77)	Transcription factor	MKNQRLLRKQRDGKKHNNNSKANSSEEIKKKLDYVHVRARRGQATDSHSLAERARREKISERMKYLQNLVPGCNKIAGKAGMLDEIINYVQSLQQQVEFLSMKVAALNHRVDFINVDDLLAKQVRLIIINSYTKII*
MELO3C026952	CmbHLH108	4.94	35656.4	Ⅵ	FRU (59)	Transcription factor	MEQFGRHLMTDINDQFELQDFIHGDNFDRYVNLIRGGNETPIFNNNFDLDFVNGCLIEDRVVDQSLEYIVDSNMVMNSDPNSLFSTLESFNSIMKEVENEDEDEDEDENESVENSSSTTSKKPKADRTRTLISERRRRGRMKEKLYALRSLVPNITKMDKASIVGDAVLYVKELQMQAKKLKAEISVLESSINETQKIHRDQTKKKIIQTSYSDQFLPTKIIQLDVFQVEERGFYLRLVCKMGERVAMSLYKVLESLTNFIIQSSNLASASDRFILTATINVRDCEVDMNLPNLKLWLTGALLNHGFEF*
MELO3C001968	CmbHLH109	5.06	9483.89	Ⅵ	PRE5 (46)	Transcription factor protein	MASSKLGDNELKNLVSKLRTLLPQLNHKPDNSSEASTGEILKETCDYIKKLQKEVDDLSERLWKQLDSMGVDFEMVKDLLIFT*
MELO3C002012	CmbHLH110	9.99	24866.7	Ⅸ	PIF7 (68)	Transcription factor	MVQENQEEEQDTKRVANRSHSARRSRAAAVHNQSERRRRDRINEKMKALQKLVPNASKTDKASMLDEVIEYLKQLQAQVQFMSVRSMQQMIMPIGIQQQLQMSLLARMGMGVGLGMGMGMLDMSGMPRSAPQALPPLIHPTSVPSTPPAFVPPHFLLPPAIPRQDPTQAKPATNGSVDPFCAFLAQTMNMDIYNKMAAFYRQQVNQTTNAMSSPTQSNNMQGN*
MELO3C002057	CmbHLH111	8.98	62713	X	BIM1 (42)	Putative transcription factor	MELPQPPRPLGTEGRKPTHDFLSLYSHSTAHQQDPSQSFQGGFLKTHDFLRPLERTGKTCAKEEKTINVSTVERAAPTSGTQAHNSPAERLLPGGIGTYSISHISYFNQRVPKPEGSVFPVPQASNTDKSDDNSHCSSLSGNGFTLWEESAVKKGKTRKENLGEKPGLKESPAKIEQWAVTTERPIQSSSSNHRSSFSSLSPSQPSGQQSRSFGEMLKSTVNVSSTEEELDDDKAFVIKKESSPSTAYKGDLKINIGGKCSDQKANTPRSKHSATEQRRRSKINDRFQKLRELIPRSDQKRDKASFLLEVIEYIQFLQEKVRKYESSPPQGWYHEPAKLIPCRNNCNPAQCYIDQSQIAKSGPVFIFAGSDEKNMCHSPAFPRCSHNPVESEVSTNTTF…
MELO3C002089	CmbHLH112	6.23	30876.4	XIII	BEE3 (50)	Transcription factor	MADFTPNFQSLKPSSFPLMDHIDPNQNPNLNFLDNIPIWFSDSFFNNQTAVPSPRFLENWGENFQGIFSQANQIITPISSPVFEPKDPFGNDLHGSIKKRKLENNDAYESSSGNSTPQVSENGINTKNNNGKGKRSKKGDTYDGDKPREVVHVRARRGQATDSHSVAERIRRGKINERLRCLQDIVPGCYKTMGMAVMLDEIINYVQSLQNQVEFLSMKLTAASSYHDFNSDSDAEGKLKGKEMREGNGGSMIASSTQLGAFDLCFGSYSTLPFNTI*
MELO3C002383	CmbHLH113	8.15	40885.9	XIII	AT5G50915 (67)	Transcription factor protein	MAAFSYQYQPFLLDSIFLHNNPLKVGGFFDEQNFNTNCFSQFYPQDQPQQQQQQQQQQPIYHFPDLSKQSPESSALVDRSDVSAELPVGHRLKPAVTVTVTSPCSKKRKSRNNSSASSAQSKGTTDHQSNGKKPKNKGELDEGKEKDQKAKNGKKLLEEKIKDSEDGGATTGYIHVRARRGQATDSHSLAERVRREKISERMKTLQRLVPGCDKVTGKALMLDEIINYVQSLQNQVEFLSMKLASLNPIFFDFRMDLDGLMIQPETTSLSSITPTLPAMAQCSVVPPQALIDTTPPATPSPAISTGNNFPLMDPSANLFLLQQGISPNNGYSQSSQDNVKVSSWDVEDQKRKQLLISSGIGDNLCYFH*
MELO3C002385	CmbHLH114	5.6	60174.2	Ⅵ	ICE1 (50)	Transcription factor	MLSRVGNVLWMENREDEDSSSWTKNNNDHNHLNHPVNCSVLNNKDEITSLSTFKSMLEVEDDWCISANALHNHNHHTDINDITFSQNFTDPPDNLLLPPGDSSSSCSPSSSVFNNIDPSQLRFFLPPTRTLSSLHKVVSNNPLEHGFDLGAEVGFLDVQASNASTLLNDGGGLLTGFTDLSPTSQMNTPNLCLGSQLTAQNVAPMGDNCSGLAGFQSFDENLGNALLLNRSKLLRPLESFPSVGAQPTLFQKRAALRKSLADKGSNLGVLSPDGGWFSNRIEGGIGKNEMGDENGKKRKMIYADELQDTSIDTSRFNYDSDDFTENTNTKLDESGRNVGNTSNANSTVTGGDQKGKKKGLPAKNLMAERRRRKKLNDRLYMLRSVVPKISKMDRASILG…
MELO3C002507	CmbHLH115	5.76	26068.7	Ⅳ	ILR3 (59)	Transcription factor	MGSPEITDWVFDYGVIEDFPVPGGDLPSLDLPSFTLPCDFTASFRADFDEPLGMAEDVKESGSRKRMSSGSSNAFESKARKEKMRRDKLNDRFLELNSILNHGRPPKLDKSAILGDAVRMIIQLRDEAQKLKESNESSLEKINEMKAEKNELRDEKQRLKEAKDGLEKKMKAFNTQPSFLPHPPAIPPGFSSPNQIVGGKLVPVIGYPGVSMWQFMPPGAIDTSQDHVLRPPVA*
MELO3C002522	CmbHLH116	5.28	37176.7	XIII	AT1G61660 (35)	Transcription factor, putative	MADEFPARSLFSAAVTNTSPCSVGNSTFLIDSTITSTSNWNQSFRGWDDGQRVDTTVVVDSMTVTKLNYDDQEITSGSEGQQNPTSFFKTTDDDHDSLFLMEQPYNIQTATNFYHNVVTTTTRQGLPMAFPFEAISIGYTPTLLPCSSLNQPTQFVVNNRTINNCCSFTNSDELLSCSPMFQTHLLHPPPLNFSNGITPKCPTKLMGCDEVVEDWSRVERENESKEIAIIKRPRSDNSSSPLPTFKVRKEKLGDKITALQQLVSPFGKTDTASVLHEAIEYIKFLHNQIRVLSTPYMEIGDHNQEPKVKNNHTFLYYILRKNTDFFNMF*
MELO3C002608	CmbHLH117	7.71	24393.4	Ⅵ	AT4G20970 (43)	basic helix-loop-helix (bHLH) DNA-binding superfamily protein	MSNPIRCQPTPQSDRKFVERNRRKEMKSLFSTLNSLLPNHTSREAPRTVPDQLEDATNYIKELQKNIQKLKEKKEELMGKNKMEEDEEAEGRRRRRFEHETKPKLLLQVKAHQIGSSVEVFLTTGSDYHFILQQVLRLLQDNGAEILNVNQSMFTDRVFHKITAQVDGEGIGPGDGERICKTVKKFVSQYKDEQCSVDYNGNGNGNGNGGEDL*
MELO3C002870	CmbHLH118	4.52	34340.2	Ⅰ	AT1G30670 (59)	BHelix-loop-helix transcription factor	MAALTFHSNFYSPDPSSYFHYFSPEFSPDLSYVPPPHLLSDPAAFPYVDDSVFYPAADTLFSDDAFPFLFSDAYPYFSAPSVDEFLPVSSQFFPFDEFEFHCPKRQRAVFEQSFCCGEGVGDGNVGGGGEGAGAGAGFFPPPLAEFFSGPWDSRMDNAEMTNDCLKSQPSPAPPAPSSNNLSAQTIAARERRRKITVKTQELGELVPGGSKMNTAEMLNSAFKYVKFLQAQVAILQLKQETEQEQEQEQEGQETENLKILESTLIQEKLYLEEKCLVPKGFIQNLADFPEIQSHPSIFNSINKILHNNS*
