# Supplementary material for: Genome-Wide Identification and Characterization of Melon bHLH Transcription Factors in Regulation of Fruit Development
Source: Plants (Basel). 2021 Dec 10;10(12):2721. doi: 10.3390/plants10122721 (PMC8709311; doi:10.3390/plants10122721)
Supplement: Supplementary file 1 [file plants-10-02721-s001.zip › Supplementary Table S2 .xlsx]

## Sheet: Sheet1
E-box	Gene_name	Strength
MELO3C017864T1	ROD1	0.996907
MELO3C006195T1	AT2G45340	0.994139
MELO3C020881T1	AT2G23690	0.990993
MELO3C003757T1	AT1G75710	0.994663
MELO3C023147T1	AT3G57400	0.99666
MELO3C005212T1	MELO3C005212	0.990156
MELO3C011117T1	XIP1	0.992277
MELO3C018805T1	AT2G32350	0.990972
MELO3C023544T1	NTT	0.99743
MELO3C023551T1	CEV1	0.99235
MELO3C002272T1	AT5G62960	0.991209
MELO3C002131T1	PMEAMT	0.993815
MELO3C005673T1	TUB6	0.992506
MELO3C020271T2	MELO3C020271	0.990185
MELO3C006476T1	IAA14	0.995433
MELO3C005413T1	AT5G51560	0.996454
MELO3C011928T1	CYP71B19	0.994438
MELO3C014337T1	CSP41A	0.992581
MELO3C006433T1	AT5G43420	0.994651
MELO3C016263T1	CSLG3	0.991429
MELO3C013751T1	MCA1	0.990841
MELO3C019113T1	AT3G56480	0.993313
MELO3C024014T1	scpl35	0.994245
MELO3C014810T1	AT3G26760	0.992415
MELO3C002124T1	MPK9	0.990264
MELO3C024260T1	IAA8	0.994701
MELO3C007221T1	AT4G18570	0.990112
MELO3C022083T1	NIK1	0.99137
MELO3C020763T1	AT4G34810	0.994353
MELO3C008672T1	DFL1	0.995285
MELO3C005224T1	GAD4	0.992414
MELO3C004367T1	NEK2	0.991565
MELO3C003275T1	AT4G33420	0.992827
MELO3C022084T1	NIK1	0.997151
MELO3C006751T1	MELO3C006751	0.995289
MELO3C005291T1	AT1G23205	0.992226
MELO3C013758T1	HK1	0.991588
MELO3C022834T3	NUDT18	0.995945
MELO3C012965T1	BAC2	0.990452
MELO3C002507T1	ILR3	0.990308
MELO3C012047T1	AT5G62620	0.997323
MELO3C025206T1	OFP1	0.993976
MELO3C005231T1	AT1G33970	0.996293
MELO3C002521T1	AT1G11440	0.990226
MELO3C010636T1	BGAL16	0.992478
MELO3C024363T1	BRX-LIKE3	0.992664
MELO3C020752T1	AT4G34760	0.993499
MELO3C006083T1	AT1G01490	0.990837
MELO3C026921T3	AT5G04250	0.994489
MELO3C008838T1	AT3G03770	0.990603
MELO3C017712T1	AGD11	0.993963
MELO3C005129T1	ABA2	0.994884
MELO3C011289T1	AT5G25170	0.993015
MELO3C002365T1	MELO3C002365	0.990896
MELO3C006675T1	AT3G06880	0.991873
MELO3C026803T1	AT2G40990	0.997393
MELO3C014486T1	AT5G26330	0.994806
MELO3C003980T1	SLP3	0.993343
MELO3C006090T1	AT1G01540	0.991173
MELO3C007561T2	AT4G36970	0.990608
MELO3C020817T1	AT2G16750	0.998234
MELO3C026134T1	MELO3C026134	0.993184
MELO3C003105T1	UMAMIT12	0.990756
MELO3C025726T1	RAP2.7	0.991215
MELO3C019741T2	AT2G05760	0.994381
MELO3C004381T2	SHY2	0.991465
MELO3C023762T1	AT5G16030	0.996562
MELO3C017132T1	AT5G62580	0.994743
MELO3C010611T1	AT3G05270	0.994417
MELO3C004362T1	AT5G11000	0.996091
MELO3C007981T1	PIRL4	0.995241
MELO3C007990T1	AT5G60710	0.992457
MELO3C025773T1	AT5G60680	0.992875
MELO3C023361T1	MELO3C023361	0.991612
MELO3C016188T1	FT1	0.992469
MELO3C021987T2	MIF2	0.992391
MELO3C021987T1	MIF2	0.994965
MELO3C022303T1	PSI-P	0.992807
MELO3C007199T2	MELO3C007199	0.994126
MELO3C016232T1	RPT2	0.990658
MELO3C014454T1	AT1G07650	0.990048
MELO3C013907T1	MELO3C013907	0.990097
MELO3C017469T1	AT5G57510	0.991156
MELO3C017706T1	AT3G28040	0.991893
MELO3C003421T1	bHLH071	0.993073
MELO3C020181T3	AT1G72410	0.991277
MELO3C017048T1	MCD1	0.990058
MELO3C006926T1	AT1G02260	0.99371
MELO3C004365T1	AT5G28150	0.993526
MELO3C024441T1	NADP-ME4	0.991375
MELO3C008023T2	AT5G64730	0.993947
MELO3C009653T2	AT3G57800	0.992096
MELO3C026936T1	AGP41	0.995464
MELO3C021449T1	ADT6	0.993556
